# 1 **Enhanced hippocampal LTP but typical NMDA receptor and AMPA receptor** 2 **function in a novel rat model of CDKL5 deficiency disorder**

3 L Simões de Oliveira<sup>1, 2</sup>, HE O'Leary<sup>5</sup>, S. Nawaz<sup>3</sup>, R Loureiro<sup>1, 2</sup>, EC Davenport<sup>1</sup>, P. Baxter<sup>1,4</sup>, OR  
4 Dando<sup>1,2,3</sup>, E. Perkins<sup>1,2</sup>, SA Booker<sup>1, 2</sup>, GE Hardingham<sup>1, 2, 4</sup>, MA Cousin<sup>1,2,3</sup>, S Chattarji<sup>1, 2, 3</sup>, TA  
5 Benke<sup>5\*</sup>, DJA Wyllie<sup>1, 2, 3\*</sup>, PC Kind<sup>1, 2, 3\*</sup>

6  
7 1 – Centre for Discovery Brain Sciences, University of Edinburgh, Edinburgh, UK ;

8 2 – Simons Initiative for the Developing Brain, Patrick Wild Centre, University of Edinburgh, UK;

9 3 – Centre for Brain Development and Repair, Instem, Bangalore, India

10 4 – UK Dementia Research Institute, University of Edinburgh, UK

11 5 – University of Colorado, School of Medicine, USA

12 \* - Corresponding authors

## 13 14 **Abstract**

15 Mutations in the X-linked gene cyclin-dependent kinase-like 5 (CDKL5) cause a severe neurological  
16 disorder characterised by early-onset epileptic seizures, autism and intellectual disability (ID). Impaired  
17 hippocampal function has been implicated in other models of monogenic forms of autism spectrum  
18 disorders and ID and is often linked to epilepsy and behavioural abnormalities. Many individuals with  
19 CDKL5 deficiency disorder (CDD) have null mutations and complete loss of CDKL5 protein, therefore  
20 in the current study we used a novel *Cdkl5* KO rat model to elucidate the impact of CDKL5 loss on  
21 cellular excitability and synaptic function of CA1 pyramidal cells (PCs). We hypothesised abnormal pre  
22 and/or post synaptic function underlie the enhanced LTP we observe in the hippocampus of *Cdkl5* KO  
23 rats. We tested this hypothesis using a combination of extracellular and whole-cell electrophysiological  
24 recordings, biochemistry, and histology. We show that NMDA receptor function and subunit expression  
25 are unaltered throughout development, and Ca<sup>2+</sup> permeable AMPA receptor mediated currents are  
26 unchanged in *Cdkl5* KO rats. We observe reduced mEPSC frequency accompanied by increased spine  
27 density in basal dendrites of CA1 PCs, however we find no evidence supporting an increase in silent  
28 synapses when assessed using a minimal stimulation protocol in slices. Additionally, we found no  
29 change in paired-pulse ratio, consistent with normal release probability in *Cdkl5* KO rats and supported  
30 by typical expression of pre-synaptic proteins in synaptosome preparations. Together these data

31 indicate a role for CDKL5 in hippocampal synaptic function and raise the possibility that altered  
32 intracellular signalling rather than synaptic deficits might contribute to the altered plasticity.

33

## 34 **Background**

35

36 Mutations in the X-linked gene cyclin-dependent kinase-like 5 (CDKL5; MIM: 300203) cause a severe  
37 neurological disorder, estimated to affect 1 in 40,000 to 1 in 60,000 live births (Olson et al. 2019).

38 Patients present with early onset seizures, sleep disturbances, motor impairments, autistic features and  
39 severe intellectual disability (ID) (Fehr et al. 2013; Olson et al. 2019).

40 Pathogenic mutations are predicted to result in loss of protein function and predominantly cluster in the

41 catalytic domain of CDKL5 (Hector, Kalscheuer, et al. 2017), which is highly conserved across mice,

42 rats and humans (Hector, Dando, et al. 2017; Hector et al. 2016). Identification of physiological

43 substrates of CDKL5 has suggested a role in cytoskeleton organisation (Muñoz et al. 2018; Baltussen

44 et al. 2018) which appears to be NMDA receptor dependent (Baltussen et al. 2018). In line with this role

45 in cytoskeleton organisation, reduced dendritic complexity and altered spine distribution have been

46 repeatedly reported in *Cdkl5* knock-out (KO) mice (Tang et al. 2017; Della Sala et al. 2016; Fuchs et

47 al. 2014; Amendola et al. 2014). These anatomical phenotypes are frequently associated with altered

48 synaptic function. Altered cellular and synaptic physiology has been reported in the hippocampus of a

49 variety of mouse models of CDKL5 deficiency disorder (CDD). Altered long-term potentiation (LTP) has

50 been observed in the hippocampus (Okuda et al. 2017) and cortex (Della Sala et al. 2016) of *Cdkl5* KO

51 mice, with suggested mechanisms including an increase in calcium permeable AMPA receptors

52 (Yennawar, White, and Jensen 2019) and NMDA receptor dysfunction (Tang et al. 2019; Okuda et al.

53 2017). These phenotypes are thought to underlie hippocampal-dependent learning and susceptibility

54 to chemically induced seizures (Okuda et al. 2017, 2018; Tang et al. 2017).

55 NMDA receptor activation during development is known to influence synapse numbers and dendritic

56 arborisation (Lüthi et al. 2001). Moreover, NMDA receptor subunit composition undergoes a

57 developmental switch and has an important role in regulating AMPA receptor presence at synapses

58 (Hall, Ripley, and Ghosh 2007). NMDA receptor development has not yet been studied in preclinical

59 models of CDD. In fact, the role of CDKL5 in synaptic function during early postnatal development and

60 juvenile stages is unknown, as most studies so far have focused on adult mice. Moreover, with

61 conflicting reports from a variety of mouse models it is imperative to identify robust physiological  
62 phenotypes that cross the species barrier in order to identify disease mechanisms and therapeutic  
63 strategies which might translate to the human condition. In the current study, we report the generation  
64 of a novel *Cdkl5* KO rat model. We hypothesised that loss of CDKL5 leads to impaired synaptic function  
65 in the hippocampus of *Cdkl5* KO rats. We examined synaptic physiology and plasticity alongside cellular  
66 morphology using a combination of extracellular and whole cell electrophysiological recordings and  
67 histology. Whilst we found increased hippocampal LTP in *Cdkl5* KO rats, we found that NMDA receptors  
68 undergo a typical developmental trajectory and we do not observe an increase in calcium permeable  
69 AMPA receptor mediated currents that could contribute to the enhanced LTP. We observe reduced  
70 mEPSC frequency accompanied by increased spine density in basal dendrites of CA1 PCs, however  
71 we find no evidence supporting an increase in silent synapses when assessed using a minimal  
72 stimulation protocol in slices. Additionally, we found no change in paired-pulse ratio, consistent with  
73 normal release probability in *Cdkl5* KO rats. Overall our data, presents evidence supporting a role for  
74 CDKL5 in hippocampal synaptic function however the underlying mechanisms are still unclear and  
75 appear to be distinct to those previously reported in mouse models of CDD.

76

## 77 **Methods**

### 78 ***Breeding and animal husbandry: Edinburgh and Bangalore***

79 All procedures were performed in line with the University of Edinburgh and Home Office guidelines  
80 under the 1986 Animals (Scientific Procedures) Act, CPCSEA (Government of India) and approved by  
81 the Animal Ethics Committee of the Institute for Stem Cell Science and Regenerative Medicine  
82 (inStem).

### 83 ***Breeding and animal husbandry: Colorado***

84 All studies conformed to the requirements of the National Institutes of Health *Guide for the Care and*  
85 *Use of Laboratory Rats* and were approved by the Institutional Animal Care and Use subcommittee of  
86 the University of Colorado Anschutz Medical Campus (protocol 00411). All rodents were housed in  
87 micro-isolator cages with water and chow available *ad libitum*.

88 Animals were bred in house on the Long Evans Hooded background and housed with littermates on a  
89 12hr light/dark cycle with food and water *ad libitum*. Experiments were performed on wild-type (*Cdkl5*<sup>+/y</sup>)  
90 and *Cdkl5* KO (*Cdkl5*<sup>-y</sup>) male rats at post-natal day (P) 28 to 35 unless otherwise stated. All experiments  
91 and data analyses were performed blind to genotype.

92

### 93 ***Cdkl5* KO rat generation and genotyping**

94 The CDKL5 KO rat model was created using CRISPR/Cas9 technology to introduce a 10 base pair (bp)  
95 deletion in exon 8 of the *Cdkl5* gene (Ensembl coordinates X:35674763-35674772, in the Rnor\_6.0  
96 genome assembly). An in-house PCR-based strategy was designed to genotype experimental animals  
97 produced from crossing *Cdkl5* KO (*Cdkl5*<sup>-/-</sup>) males with wild-type females. Forward and reverse primers  
98 were generated flanking the bp deletion site in exon 8 of the rat CDKL5 gene (F1 and R), a third forward  
99 primer which anneals to the 10 bp deletion site in the WT allele (F2) and a further forward primer which  
100 anneals over the deleted 10 base pairs in the KO allele (F3) were also generated (Figure 1).

101 F1: 5' -GGGCTTG TAGCAAATCCATCC- 3'

102 R: 5' -AGCAAGCAGAGTTCTATTTTCCT- 3'

103 F2: 5' -ATACGTGGCTACTCGGTGGTAC- 3'

104 F3: 5' -CAGAATACGTGGCTACCGATC- 3'

105 To distinguish between DNA derived from wild-type and *Cdkl5*<sup>-/-</sup> male littermates, primers F1, R and F2  
106 were used in the same PCR reaction. Two bands were detected for wild-type male animals (356 and  
107 135 bp) whereas only one band was detected for *Cdkl5* KO male animals (346 bp) (Figure 1). To  
108 distinguish between DNA derived from wild-type and heterozygous female littermates, primers F1, R  
109 and F3 were used in the same reaction. One band was detected for wild-type female animals (356 bp)  
110 whereas two bands were detected for heterozygous female animals (356 and 129 bp).

111 Genomic DNA was extracted from fragments of tissue using the HotShot method. PCR was carried out  
112 as per the manufacturer's guidelines for GoTaq G2 Polymerase (Promega, M784B) with an annealing  
113 temperature of 58°C and a 1 minute extension time.

114 Following initial validation experiments all genotyping was carried out by Transnetyx Inc.

115

### 116 ***Acute slice preparation for electrophysiology***

117 Acute brain slices were prepared from *Cdkl5*<sup>+/-</sup> and *Cdkl5*<sup>-/-</sup> at postnatal day (P) 28 to 35 (unless  
118 otherwise noted) similarly to previously described (Oliveira, Sumera, and Booker 2021). Briefly, rats  
119 were anaesthetised with isoflurane and subsequently decapitated. The brain was rapidly removed and  
120 placed in ice-cold carbogenated (95 % O<sub>2</sub>/5 % CO<sub>2</sub>) sucrose-modified artificial cerebrospinal fluid (in  
121 mM: 87 NaCl, 2.5 KCl, 25 NaHCO<sub>3</sub>, 1.25 NaH<sub>2</sub>PO<sub>4</sub>, 25 glucose, 75 sucrose, 7 MgCl<sub>2</sub>, 0.5 CaCl<sub>2</sub>). 400

122  $\mu\text{m}$  horizontal hippocampal slices were cut on a Vibratome (VT1200s, Leica, Germany). Slices  
123 recovered submerged in sucrose-ACSF at 34°C for 30 min and were then stored at room temperature  
124 until needed.

125 Alternatively, to assess NMDA receptor-mediated EPSCs throughout development and respective  
126 pharmacology, P7-22 *Cdk15<sup>-y</sup>* and *Cdk15<sup>+y</sup>* rats were rapidly decapitated and the brain removed.  
127 Parasagittal slices (400  $\mu\text{m}$ ) were prepared on a Leica VT 1200 microtome in ice cold solution  
128 containing (in mM) 206 Sucrose, 2.8 KCl, 1.25  $\text{NaH}_2\text{PO}_4$ , 26  $\text{NaHCO}_3$ , 10 Glucose, 10  $\text{MgSO}_4$ , 2  
129 NaAscorbate, 0.4  $\text{CaCl}_2$ , and 2.5 N-acetyl L-cysteine. Scalpel cuts were made to remove CA3 while  
130 retaining the CA1 region of the hippocampus with the overlying cortex and dentate gyrus intact for  
131 electrophysiology. Slices were then recovered > 60 min at room temperature in a submersion chamber  
132 in standard artificial Cerebral Spinal Fluid (aCSF), containing (in mM) 124 NaCl, 26  $\text{NaHCO}_3$ , 1.2  
133  $\text{NaH}_2\text{PO}_4$ , 10 D-glucose, 3 KCl, 2 NaAscorbate, 1  $\text{MgSO}_4$ , 2  $\text{CaCl}_2$ , and 2.5 N-acetyl L-cysteine) prior  
134 to all experiments. All solutions were oxygenated with 95%  $\text{O}_2$  - 5%  $\text{CO}_2$ .

135

### 136 ***Field LTP recordings***

137 Slices were transferred to a submerged recording chamber perfused with warm carbogenated recording  
138 ACSF (in mM: 125 NaCl, 2.5 KCl, 25  $\text{NaHCO}_3$ , 1.25  $\text{NaH}_2\text{PO}_4$ , 25 glucose, 1  $\text{MgCl}_2$ , 2  $\text{CaCl}_2$ ) at a flow  
139 rate of 3-4 mL/min. Extracellular field recording electrode was filled with recording ACSF and placed in  
140 the *stratum radiatum* (*Str Rad*) of the CA1 region. Single pulses of electric stimulation (200  $\mu\text{s}$ , 0.5 Hz)  
141 were delivered through a bipolar electrode (Ni:Cr) placed in the *Str Rad* to stimulate the Schaffer  
142 collateral (SC) pathway. Stimulus intensity was adjusted to produce 50% of the maximum field  
143 excitatory post-synaptic potential (fEPSP) amplitude. LTP was induced by tetanic stimulation (two trains  
144 of 1 s 100 Hz stimulation, 20 s inter-train interval, Komiyama et al., 2002) following 20 minutes of stable  
145 baseline. fEPSP slopes were normalised to baseline values and LTP magnitude reported as the  
146 average fEPSP slope in the final 10 min (50-60 min post-induction) of the recording divided by the  
147 average fEPSP slope during the baseline period. Data acquisition and analysis were performed on  
148 WinLTP (Anderson and Collingridge 2007).

149

### 150 ***Whole-cell patch-clamp recordings***

151 For whole-cell recordings, slices were transferred to a submerged recording chamber perfused with  
152 warm carbogenated recording ACSF (in mM: 125 NaCl, 2.5 KCl, 25 NaHCO<sub>3</sub>, 1.25 NaH<sub>2</sub>PO<sub>4</sub>, 25  
153 glucose, 1 MgCl<sub>2</sub>, 2 CaCl<sub>2</sub>), at a flow rate of 6-8 mL/min. All recordings were performed at 31±1 °C  
154 unless otherwise stated. Infrared differential interference contrast (IR-DIC) video microscopy, using a  
155 digital camera (Qimaging) mounted on an upright microscope (Olympus BX51WI) and a 40x (0.8NA)  
156 water immersion objective was used for all experiments. Recordings were obtained with a Multiclamp  
157 700B (Molecular Devices) amplifier, signals were Bessel filtered online at 5 kHz and digitized at 20 kHz  
158 (Digidata1440, Molecular Devices) coupled to the Clampex software (pCLAMP™ Software, Molecular  
159 Devices). Recording pipettes were pulled from borosilicate glass capillaries (1.7 mm outer/1mm inner  
160 diameter, Harvard Apparatus, UK) on a horizontal electrode puller (P-97, Sutter Instruments, CA, USA),  
161 with resistance of 4-9 MΩ when filled with internal solution. For voltage-clamp recordings glass  
162 electrodes were filled with cesium based internal solution (in mM: 110 CsOH, 110 D-gluconic acid, 20  
163 CsCl, 10 HEPES, 10 phospho-creatine, 4 MgATP, 4 NaCl, 0.3 Na<sub>2</sub>GTP, 0.2 EGTA, 5 QX314Cl) unless  
164 stated otherwise. A potassium gluconate based internal solution (in mM 120 K-gluconate, 20 KCl, 10  
165 HEPES, 10 phospho-creatine, 4 MgATP, 4 NaCl, 0.3 Na<sub>2</sub>GTP, 2.7 biocytin, pH=7.4, Osm=290-310)  
166 was used for whole cell current clamp recordings.  
167 Cells were rejected if series resistance >30 MΩ, or the series resistance changed by more than 20%  
168 over the course of the recording. No series resistance cancellation or junction potential corrections were  
169 performed.

170

### 171 ***Evoked EPSCs***

172 CA3 inputs to CA1 pyramidal cells were stimulated by placing a stimulating bipolar electrode (Ni:Cr or  
173 insulated tungsten) in the *Str rad* in hippocampal slices with the CA3 containing portion of the slice  
174 severed. A single 100 μs current pulse was delivered by an isolated constant current simulator (DS3,  
175 Digitimer.Ltd or WPI, Sarasota, FL). Evoked EPSCs were recorded in voltage-clamp using a cesium  
176 based intracellular solution.

### 177 *NMDAR/AMPA and paired-pulse ratio*

178 AMPA receptor-mediated EPSCs were recorded at -70 mV in the presence of 50 μM picrotoxin to block  
179 GABA<sub>A</sub> receptors. The same cell was then held at +40 mV to record pharmacologically isolated NMDA  
180 receptor-mediated EPSCs in the presence of 50 μM picrotoxin and 10 μM CNQX. NMDAR/AMPA

181 ratios were calculated from peak amplitude of NMDA receptor and AMPA receptor-mediated EPSCs.  
182 We assessed paired-pulse ratio by evoking two EPSCs 50 ms apart, whilst holding the cell at -70 mV  
183 in the presence of 50  $\mu$ M picrotoxin and calculating the ratio of the amplitude of the second EPSC  
184 relative to the first EPSC.

#### 185 *NMDA receptor development and pharmacology*

186 A cesium based internal solution containing (in mM) 135 CsMeSO<sub>4</sub>, 10 HEPES, 10 BAPTA, 5 Qx314,  
187 0.3 NaGTP, 4 Na<sub>2</sub>ATP, 4 MgCl<sub>2</sub>, and 0.1 spermine, pH 7.25 with 1 M CsOH was used. Recordings  
188 were performed at room temperature and extracellular solution was exchanged at a flow rate of 3-4  
189 mL/min. AMPA receptor-mediated EPSCs were recorded at -70 mV, and NMDA receptor-mediated  
190 EPSCs were recorded at +40 mV. Peak current for NMDA receptor-mediated EPSCs was taken at 70  
191 ms after the peak of the AMPA receptor-mediated EPSC. NMDA receptor sensitivity to block by GluN2B  
192 receptor antagonist Ro 25-6981 was determined by recording a 5 min baseline, followed by Ro 25-6981  
193 (5  $\mu$ M) perfusion onto the slice for 20 min.

#### 194 *AMPA-R I-V relationship*

195 To assess the presence of calcium permeable AMPA receptors, AMPA receptor-mediated EPSCs were  
196 recorded in the presence of 50  $\mu$ M picrotoxin to block GABA<sub>A</sub> receptors and 50  $\mu$ M AP-5 to block NMDA  
197 receptors, over a range of voltages from -80 mV to +40 mV. Rectification index was calculated dividing  
198 peak EPSC amplitude at -60mV over peak EPSC amplitude at +40 mV. The same intracellular cesium  
199 based intracellular solution was used with added 0.1 mM spermine to maintain rectification of GluA2-  
200 lacking AMPA receptors.

#### 201 *Minimal stimulation*

202 Minimal stimulation protocol was used to assess the presence of silent synapses. Once a reliable EPSC  
203 was identified at -70mV, stimulus amplitude was reduced until the synaptic response would fail in some  
204 of the trials, allowing for the stimulation of a single or a small number of synapses.

205 Following recording of 50 trials at a holding potential of -70 mV, corresponding to AMPA receptor-  
206 mediated EPSCs, the cell was depolarised to -40 mV, to reveal mixed AMPA and NMDA receptor-  
207 mediated EPSCs and an additional 50 trials were recorded. To determine response probability the  
208 traces for each holding potential were visually inspected and the number of traces with a visible EPSC  
209 was divided by the total number of traces for each cell. The ratio of response probability at the two

210 holding potentials was used as an estimate for the relative abundance of silent synapses (Harlow et al.  
211 2010; Isaac et al. 1997).

### 212 **Miniature EPSC recordings**

213 Miniature EPSCs (mEPSCs) were recorded in voltage clamp while holding the cell at -70 mV, using a  
214 cesium gluconate based internal solution. Recordings were performed in recording ACSF in the  
215 presence of 50  $\mu$ M picrotoxin and 300 nM TTX to block voltage gated sodium channels and  
216 consequently action potential firing. Analysis of mini EPSC frequency and amplitude over 1 minute of  
217 recording was performed using a template matching algorithm (Clements and Bekkers 1997) in Stimfit  
218 (Guzman, Schlögl, and Schmidt-Hieber 2014). A similar number of mini EPSC events was analysed  
219 for each condition.

### 220 **Intrinsic Physiology**

221 Passive and active membrane properties were assessed to examine intrinsic excitability as previously  
222 described (Oliveira, Sumera, and Booker 2021) . Passive membrane properties, including membrane  
223 time constant and input resistance, were measured from the voltage response to a 500 ms  
224 hyperpolarizing 10 pA step. Rheobase current and action potential (AP) firing frequency were  
225 determined from a series of depolarising current steps (0 to +400 pA, 500 ms) while holding the cell at  
226 -70mV with a bias current. AP properties were determined from the first AP elicited.

227 All analysis of electrophysiological data was performed using the open source software package Stimfit  
228 (Guzman, Schlögl, and Schmidt-Hieber 2014), blinded to genotype.

229

### 230 **Synaptosome preparation**

231 *Cdk15<sup>+/-</sup>* and *Cdk15<sup>-/-</sup>* rats were killed by exposure to CO<sub>2</sub> and decapitated. The hippocampus from each  
232 hemisphere was dissected in ice- cold 1x sucrose-EDTA buffer (0.32 M sucrose, 1 mM EDTA, 5 mM  
233 Tris, pH 7.4). The tissue was snap-frozen and stored at -80 °C until used for synaptosome preparation.

234 On the day of preparation, the tissue was quickly thawed at 37 °C and homogenized in ice-cold 1x  
235 sucrose/EDTA buffer using 5-6 up-and-down strokes of a pre-chilled Teflon glass with motorized  
236 homogenizer (Dunkley, Jarvie, and Robinson 2008). Homogenates were centrifuged at 2800 rpm for  
237 10 minutes at 4°C. The discontinuous (3% uppermost, 10% middle and 23% bottom) Percoll-density  
238 gradient was prepared prior to homogenization. The supernatant (S1) was added gently on 3% Percoll-  
239 sucrose (Percoll, P1644, Sigma Aldrich, UK) and centrifuged at 20,000 rpm for 8 min at 4°C. The



240 fraction between 23% and 10% was collected and re-suspended in HEPES-Buffered-Krebs (HBK; in  
241 mM: 118.5 NaCl, 4.7 KCl, 1.18 MgSO<sub>4</sub>, 10 Glucose, 1 Na<sub>2</sub>HPO<sub>4</sub>, 20 HEPES, pH 7.4 balanced with  
242 Trizma) followed by centrifugation at 13,000 rpm for 15 min at 4°C. The pellet containing pure  
243 synaptosomes was dissolved in RIPA buffer (phosphatase inhibitor and protease inhibitor added).  
244 Protein quantification was performed with MicroBCA Assay kit (Pierce BCA protein estimation kit,  
245 23225, ThermoFisher Scientific).

246

## 247 **Western Blots**

248 Approximately 10 µg of synaptosome protein was separated on a precast gradient gel (NuPAGE 4-12%  
249 Bis-Tris Protein Gels, NP0336BOX, Thermo Fisher) and transferred to nitrocellulose membrane  
250 (Amersham™ Protran® Western Blotting Membrane, Nitrocellulose, GE10600002, Sigma Aldrich)  
251 using Bio-Rad transfer apparatus. Total proteins were stained with using reversible protein stain kit  
252 (Memcode 24580, Thermo Fisher Scientific) according to the manufacturer's instructions. After  
253 removing the stain, membranes were blocked with 1:1 TBS1X: Odyssey Blocking Buffer (P/N-927-  
254 50003, LI-COR Biotech.) for an hour at room temperature, followed by overnight incubation with primary  
255 antibodies (CDKL5- 1:1000, #HPA002847, Atlas Antibodies-Sigma Aldrich; NMDAR1-1:1000,  
256 #700685, Thermo Fisher; NMDAR2A-1: 1000, #ab169873, Abcam; NMDAR2B- 1:1000, #610417, BD  
257 Biosciences; PSD95- 1:2000, #76115, Abcam; GluR1- 1:1000, #MAB2263, Millipore; GluR2- 1:1000,  
258 #MABN1189, Millipore; RIM1/2- 1:2000, #140203, SYSY; Munc18-1- 1:2000, #116 011, SYSY;  
259 SNAP25- 1:1000, #111 011, SYSY; Synapsin1- 1:1000, #ab64581, Abcam; Synaptophysin- 1:10,000,  
260 #ab32127, Abcam; VAMP2- 1: 10,000, #ab3347, Abcam) at 4°C. Membranes were washed with  
261 TBST1X (0.1% Tween 20), and incubated for an hour at room temperature with secondary antibodies  
262 (IRDye 800CW Goat anti Rabbit IgG- 1:10,000, #P/N 925-32211; IRDye 680LT Goat anti Mouse IgG-  
263 1:10,000, #P/N 925-68020, LI-COR Biotechnology). Membranes were washed with TBST1X, dried and  
264 digitally scanned using Fc Odyssey Infrared Imaging System, LI-COR, UK Ltd. Odyssey software, Licor  
265 Image Studio Lite (LCOR Biosciences) was used to quantify individual bands. Data was normalised to  
266 respective total protein and then normalised to WT.

267

## 268 **Histology**

269 Slices used for electrophysiology experiments were fixed in 4% paraformaldehyde (PFA) over  
270 night and stored in PBS (phosphate buffered saline) at 4 °C until used for histology. Slices were washed  
271 in PBS and incubated in PBS with 0.3% triton-X and Alexa488 or Alexa568-conjugated streptavidin  
272 (1:500 dilution, Molecular probes, Invitrogen, USA) over night. Slices were then washed in PB and  
273 mounted on glass slides using Vectashield Hardset mounting medium (H-1400, Vector Labs).

274

## 275 **Image acquisition and analysis**

276 To reconstruct cells and examine their morphology, multiple Z-stacks were taken in order to  
277 capture the entire biocytin-filled cell on an inverted confocal microscope (Axiovert LSM510, Zeiss) under  
278 a 20x Plan Neofluar (NA 0.5) objective (Zeiss). The Z-stacks obtained for a given cell were stitched  
279 using the 3D stitching plug in FIJI (ImageJ), and the cell was reconstructed using the Simple Neurite  
280 Tracer plug in (Longair, Baker, and Armstrong 2011). Sholl analysis was then performed on the  
281 skeletonised paths to examine dendritic complexity. To examine spine distribution in biocytin-filled cells,  
282 Z-stacks were taken from basal and apical (oblique and tuft) dendrites (2-3 dendrite sections per  
283 dendrite type per cell). Spines were imaged under a 63x Plan Apochromat (NA 1.4) oil immersion  
284 objective on an inverted confocal microscope (Axiovert LSM510, Zeiss), with a 2.8x zoom, 2x average  
285 line scan, 1024x1024 resolution, 0.14 µm Z step. Huygens Essential software (Scientific volume  
286 imaging, Netherlands) was used for deconvolution. The deconvolved images were used for analysis on  
287 FIJI (ImageJ). Z-projections of the deconvolved Z-stacks were used to manually count spines using the  
288 cell counter tool. For each dendrite section, the number of spines was normalised to the length of the  
289 section of dendrite analysed.

290

## 291 **Statistical analysis**

292 All experiments and data analysis were performed blind to genotype. Where appropriate linear mixed  
293 effect models and general linear mixed effect models were implemented using the R package lme4  
294 (Bates et al. 2014) on RStudio. Genotype was set as fixed effect and animal, slice (and cell where  
295 relevant) as random effects, allowing for direct measurement of genotype effect while accounting for  
296 the variability resulting from random effects. Where alternative statistical tests were used, Graphpad  
297 prism 7 was used to perform statistical comparisons across groups using two-tailed unpaired T-tests,

298 repeated measures two-way ANOVA, or non-parametric tests as appropriate. In this case statistical  
299 testing was performed on animal averages to avoid pseudo-replication.

300 Details on sample size and statistical test used are presented in the results text and figure legends.

301

## 302 **Results**

### 303 ***Validation of CDKL5 KO rats***

304 In collaboration with Horizon Discovery, the CDKL5 KO rat model was created using CRISPR/Cas9  
305 technology to introduce a 10 base pair (bp) deletion in exon 8 of the *Cdkl5* gene (Ensembl coordinates  
306 X:35674763-35674772, in the Rnor\_6.0 genome assembly). The deletion in constitutive exon 8 of the  
307 *Cdkl5* gene leads to a premature stop codon in constitutive exon 9 (Figure 1A). A genotyping strategy  
308 with primers flanking (F1, R) and overlapping (F2) the deletion site was used to distinguish WT and KO  
309 animals, with two bands detected for WT males (356 and 135 bp) whereas only one band was present  
310 for *Cdkl5*<sup>-y</sup> rats (346 bp) (Figure 1A-B). Examination of RNA-seq reads mapping to the *Cdkl5* locus  
311 confirmed the 10 bp deletion and revealed no cryptic splicing around the deletion. Thus, all transcripts  
312 produced from the locus are expected to contain the premature stop codon. The lack of CDKL5 protein  
313 expression was confirmed by western blot in hippocampal synaptosome preparations, where the 115  
314 kDa band corresponding to CDKL5 is present in WT but not in *Cdkl5*<sup>-y</sup> rats (Figure 1C, quantified in  
315 1D). Absence of CDKL5 protein in *Cdkl5*<sup>-y</sup> rats was further validated using proteomic analysis. *Cdkl5*<sup>-y</sup>  
316 rats were generally healthy with normal body weight and no overt behaviour phenotypes. *Cdkl5*<sup>-y</sup> rats  
317 did not exhibit observable spontaneous seizures.

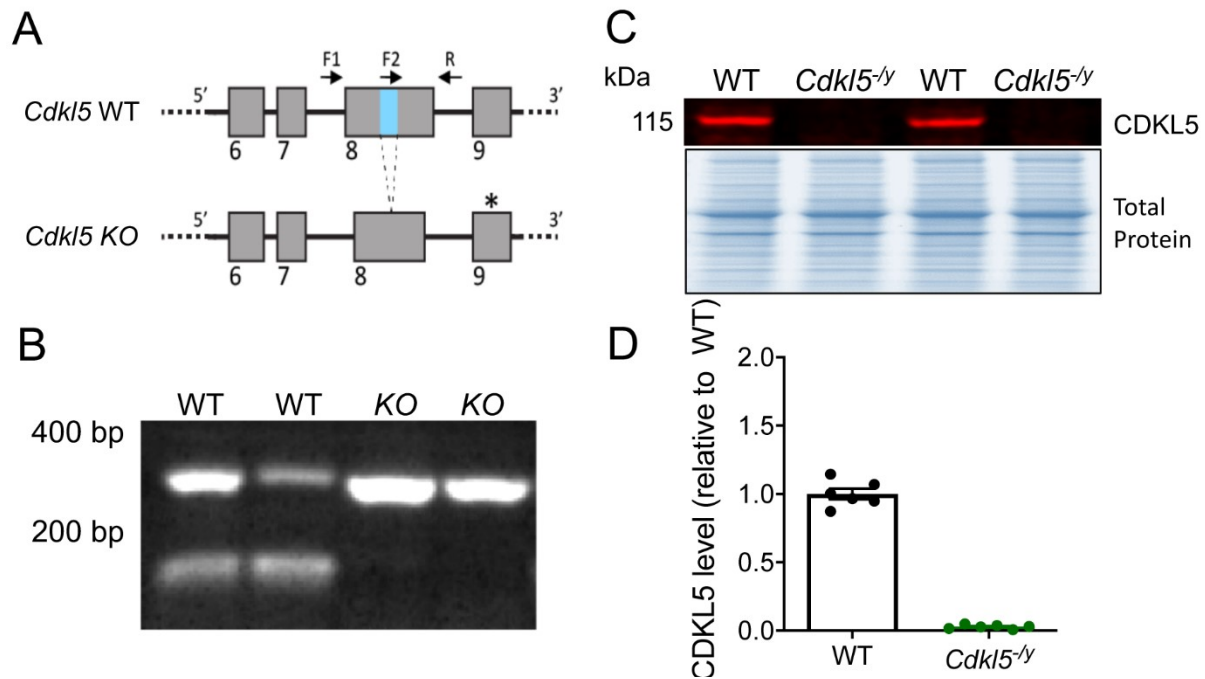

318

### 319 **Figure 1. Validation of *Cdkl5* knock out rats**

320 A - Schematic of the *Cdkl5* knockout strategy depicting the wild-type (WT) and null alleles. The null  
321 allele has a 10 base pair (bp) deletion in exon 8 (region shown in blue in WT allele), leading to a frame  
322 shift and an in frame, premature STOP codon forming in exon 9 (\*). B - Genotyping results from male  
323 WT and *Cdkl5* null animals. Higher band in WT and KO animals resulting from F1 and R primers  
324 product. Lower band in the WT samples resulting from F2 and R primer products is absent in the null  
325 samples due to the 10 bp deleted sequence. C - Western blot showing the absence of CDKL5 in  
326 hippocampal synaptosomes from the *Cdkl5* null rats. D - Quantification of CDKL5 WB protein  
327 expression in hippocampal synaptosomes.

328

### 329 **Enhanced hippocampal LTP in *Cdkl5*<sup>-/-</sup> rats**

330 To examine synaptic plasticity in the hippocampus of *Cdkl5*<sup>-/-</sup> rats we performed extracellular field  
331 recordings in horizontal hippocampal slices from *Cdkl5*<sup>-/-</sup> rats and their WT littermate controls aged P28  
332 to P35. We measured the slope of the field EPSP evoked by stimulation of Schaffer collateral inputs to  
333 CA1 over a baseline period of 20 minutes and for 1 h following tetanic stimulation (Figure 2). Analysis  
334 of the LTP time course (Figure 2B) and the EPSP slope in the final 10 minutes of the recording as a  
335 percentage of the baseline EPSP slope (Figure 2C) revealed and enhanced LTP in *Cdkl5*<sup>-/-</sup> rats ( $176.1$   
336  $\pm 5.6$  %) relative to WT ( $138.3 \pm 5.8$  %, Two tailed T test,  $T=4.45$ ,  $df=19$ ,  $p=0.003$ ). Interestingly, this is  
337 a transient effect as the magnitude of LTP is restored to WT levels by 12 weeks of age (Supplemental  
338 Figure 1).

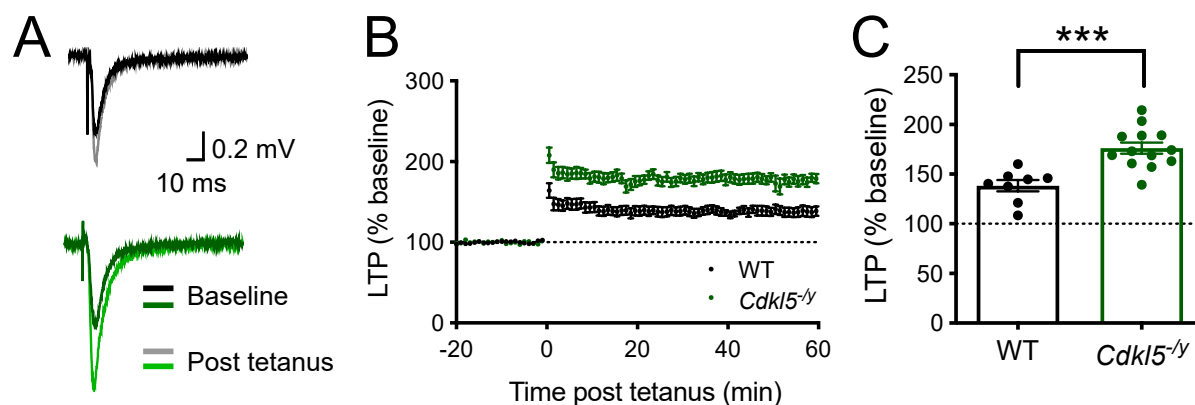

339

340 **Figure 2. Hippocampal long term potentiation (LTP) in juvenile *Cdkl5*<sup>-/-</sup> rats.**

341 **A** - Representative WT (upper) and *Cdkl5*<sup>-/-</sup> (lower) fEPSP traces before (baseline) and after (post  
342 tetanus) LTP induction. **B** - Time-course showing long term potentiation (LTP) in the hippocampal CA1  
343 induced by two trains with 100 pulses at 100Hz (20 seconds apart), resulting in a significant increase  
344 in LTP in *Cdkl5*<sup>-/-</sup> rats when compared to WT. **C** - LTP in the final 10 minutes of the recording relative  
345 to baseline (WT n = 8 rats; *Cdkl5*<sup>-/-</sup>: n = 13 rats; \*p<0.05 Two tailed T test, dots represent animal  
346 averages).

347

348 ***Unaltered NMDA receptor and AMPA receptor function***

349 Both AMPA receptor and NMDA receptor dysfunction and altered subunit composition have been  
350 implicated in abnormal LTP in mouse models of CDD (Okuda et al. 2017; Yennawar, White, and Jensen  
351 2019). We assessed the NMDAR/AMPA ratios of synaptic responses at the Schaffer collateral  
352 synapse of CA1, to test whether NMDA receptor function was altered in *Cdkl5*<sup>-/-</sup> rats, possibly  
353 contributing to the enhanced LTP phenotype observed. AMPA receptor-mediated currents were  
354 recorded at a holding potential of -70 mV, whilst NMDA receptor-mediated EPSCs were recorded at  
355 +40 mV in the presence of the AMPA receptor antagonist CNQX (Figure 3A). CA1 pyramidal neurons  
356 in WT rats exhibited NMDAR/AMPA ratio of  $0.62 \pm 0.08$  (Figure 3B, B') and an average NMDA  
357 receptor-mediated EPSC decay time of  $85.69 \pm 5.07$  ms (Figure 3C, C'), which were unaltered in *Cdkl5*<sup>-/-</sup>  
358 rats ( $0.84 \pm 0.14$ , GLMM: p=0.31;  $105.3 \pm 16.50$  ms, p=0.78 Mann-Whitney test, respectively). These  
359 data indicate NMDA receptor function and subunit composition is unaltered in the absence of CDKL5.  
360 In line with the findings from electrophysiology experiments, the expression of NMDA receptor subunits  
361 GluN1, GluN2A and GluN2B was unaffected in the absence of CDKL5, as seen by comparable  
362 expression levels of these proteins in hippocampal synaptosome preparations from WT and *Cdkl5*<sup>-/-</sup>  
363 rats (Figure 3 D-G).

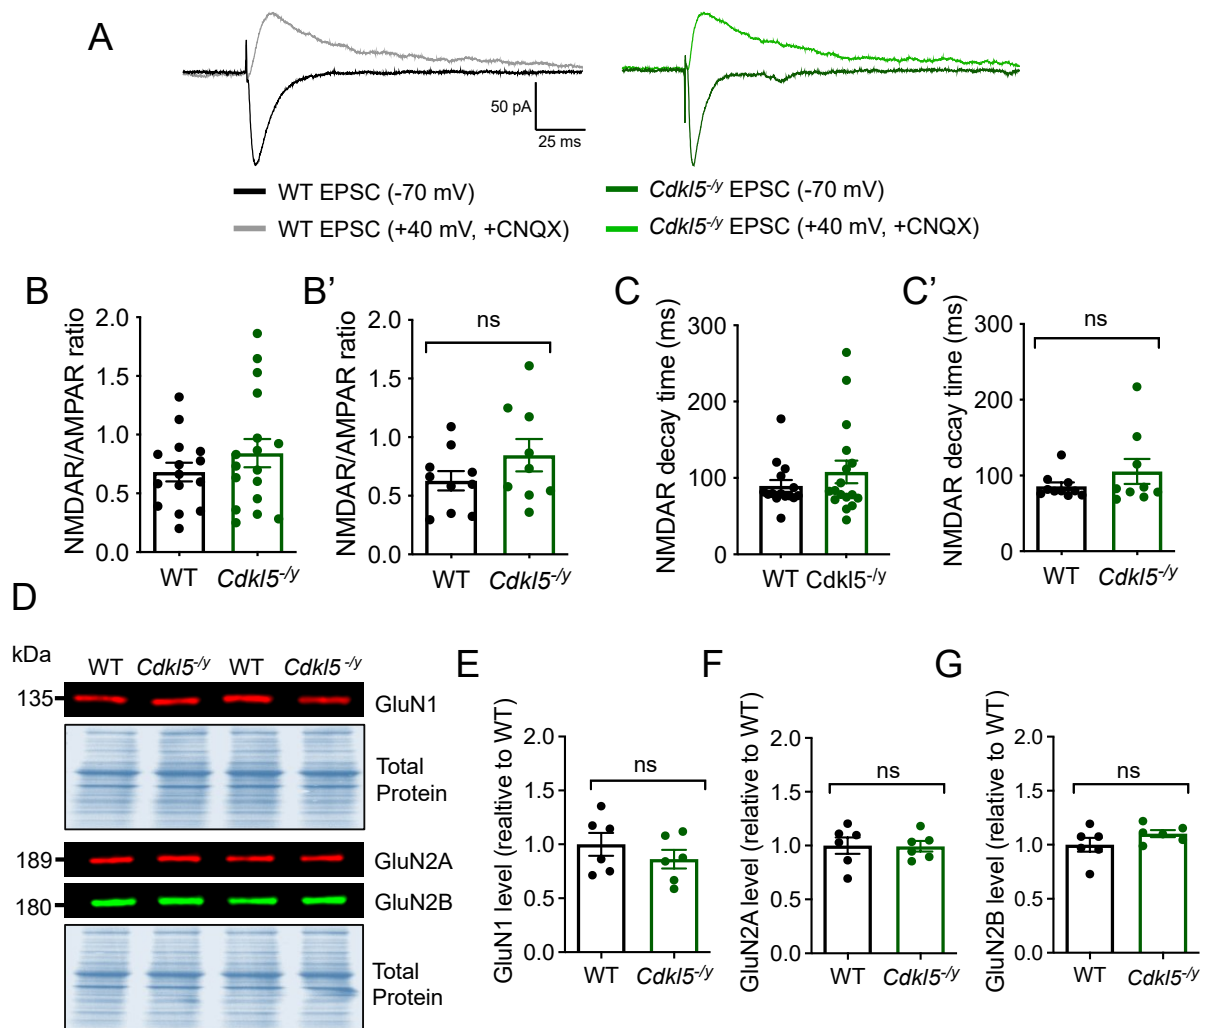

364

365 **Figure 3. Unaltered NMDA receptor function and subunit composition in the hippocampus of**  
 366 **P28-35 *Cdk15*<sup>-/-</sup> rats. A** – Representative traces of AMPA receptor and NMDA receptor-mediated  
 367 currents evoked by stimulating Schaffer collateral inputs to CA1. **B, B'** – NMDAR/AMPA ratio ( $p=0.31$   
 368 GLMM), **C, C'** – Pharmacologically isolated NMDA receptor-mediated EPSC decay time ( $p=0.78$  Mann-  
 369 Whitney U test performed on animal averages). Data shown as mean  $\pm$  SEM (WT  $n = 10$  rats / 14 cells;  
 370 *Cdk15*<sup>-/-</sup>;  $n = 9$  rats / 18 cells), dots represent individual cells (B, C) and respective animal averages (B',  
 371 C'). **D** – Representative western blot images from synaptosome preparations probed for NMDA receptor  
 372 subunits GluN1, GluN2A, GluN2B and respective Total Protein stain. **E-G** – Quantification of protein  
 373 expression level normalised to total protein and WT. Data shown as mean  $\pm$  SEM. ns- $p>0.05$  Two-tailed  
 374 T test.

375 Nonetheless, NMDA receptor subunit composition undergoes a developmental switch and has an  
 376 important role in regulating AMPA receptor presence at synapses (Hall, Ripley, and Ghosh 2007). To  
 377 the best of our knowledge, NMDA receptor development has not yet been studied in preclinical models  
 378 of CDD, as studies conducted in mouse models have been largely restricted to adults. As such we  
 379 examined NMDA receptor function over development to assess whether the developmental trajectory  
 380 of NMDA receptor subunit composition is altered in *Cdk15*<sup>-/-</sup> rats, potentially contributing to long lasting  
 381 effects at the circuit level.

382 NMDAR/AMPA ratios and decay time constant of NMDA receptor-mediated EPSC were assessed in  
383 CA1 pyramidal cells from P7-22 rats (Figure 4A, B). In WT rats, the NMDAR/AMPA ratio decreased  
384 from  $1.24 \pm 0.27$  at P7-11 to  $0.54 \pm 0.13$  at P18-22 (Figure 4A, 2-Way ANOVA age effect:  $F(2, 36) =$   
385  $5.821$ ,  $p=0.006$ ), consistent with increased expression of AMPA receptor as development progresses  
386 (Pickard et al. 2000). This was accompanied by a reduction in decay time constant of the NMDA  
387 receptor-mediated EPSC from  $562.9 \pm 43.4$  to  $245.2 \pm 20.3$  over the same period (Figure 4B, 2-Way  
388 ANOVA age effect:  $F(2, 36) = 25.77$ ,  $p<0.0001$ ), consistent with an increased contribution of the NMDA  
389 receptor subunit GluN2A to synaptic transmission during development (Flint et al. 1997).

390 *Cdkl5*<sup>-y</sup> rats followed a similar developmental trajectory with NMDAR/AMPA decreasing from  
391  $1.12 \pm 0.32$  to  $0.46 \pm 0.06$ , and decay time from  $534.4 \pm 73.12$  ms to  $294.0 \pm 16.9$  ms. This was not  
392 significantly different from WT when tested with a 2 Way ANOVA performed on animal averages  
393 (NMDAR/AMPA - Interaction:  $F(2, 36) = 0.1397$ ,  $p=0.87$ , genotype effect:  $F(1, 36) = 0.1043$ ,  $p=0.75$ ;  
394 decay time - interaction:  $F(2, 36) = 0.5142$ ,  $p=0.60$ , genotype effect:  $F(1, 36) = 0.2326$ ,  $p=0.63$ ).

395 Recordings in the presence of the GluN2B receptor antagonist Ro 25-6981 were performed to further  
396 examine the subunit composition of NMDA receptors during development (Figure 4 C-E). The  
397 percentage of NMDA receptor-mediated current blocked in the presence of RO 25-6981 decreased with  
398 age from  $65.99 \pm 6.18\%$  at P7-11 to  $48.06 \pm 8.80\%$  at P18-22 in WT rats. The block produced by Ro  
399 25-6981 application was unaltered in *Cdkl5*<sup>-y</sup> rats (Figure 4E, Two-Way ANOVA Interaction:  $F(2, 26)$   
400  $= 0.542$ ,  $p=0.59$ , genotype effect:  $F(1, 26) = 0.002$ ,  $p=0.97$ ). These data are further supported by the  
401 similar expression of NMDA receptor subunits in synaptosome preparations across genotypes in P14  
402 rats (Supplemental Figure S2).

403 Overall, these data suggest that the developmental switch in NMDA receptor subunit composition and  
404 NMDA receptor contribution to synaptic transmission is unaltered in *Cdkl5*<sup>-y</sup> rats.

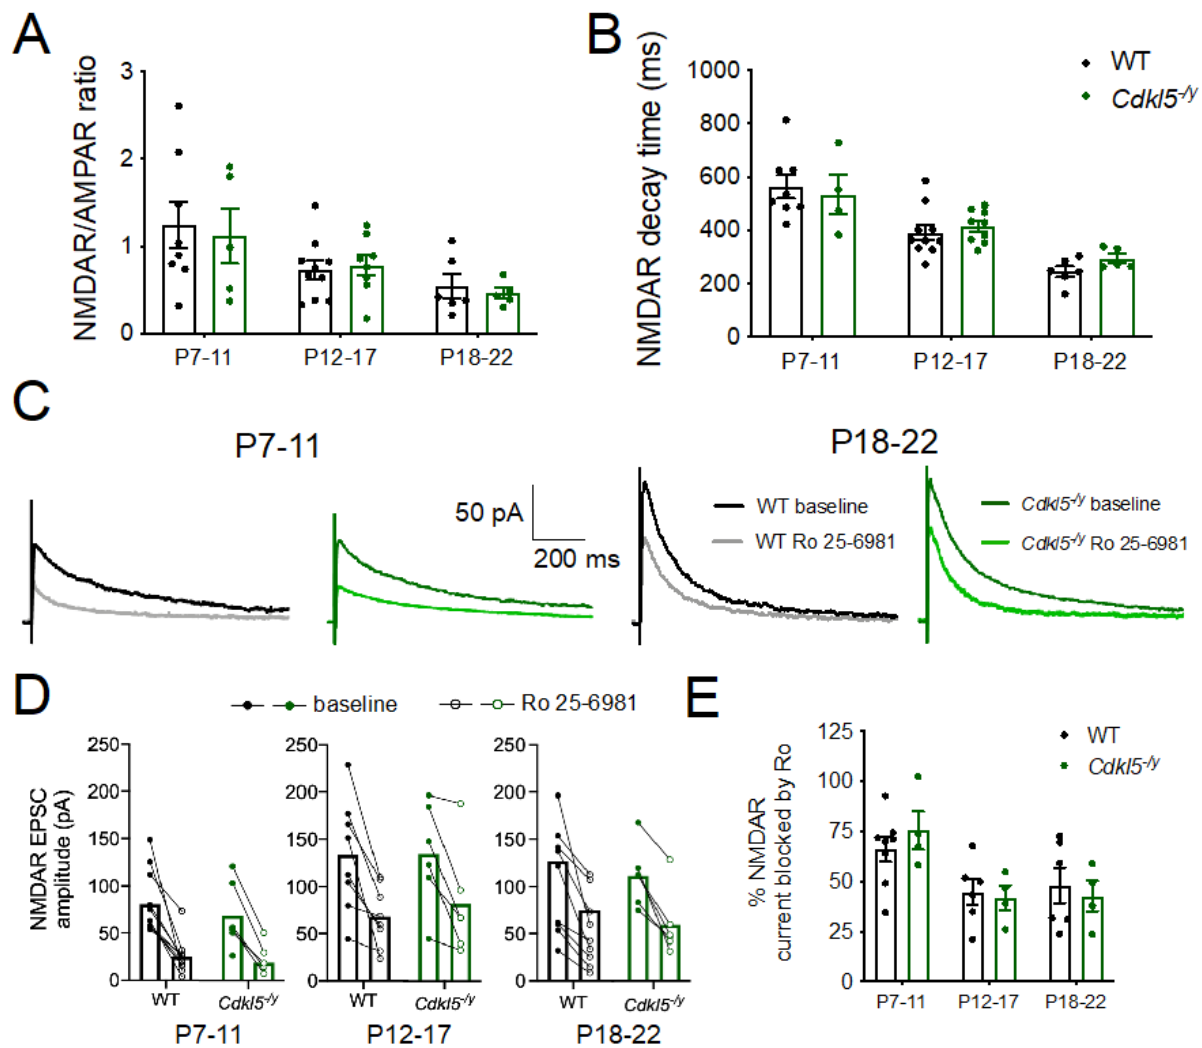

405  
406  
407  
408  
409  
410  
411  
412  
413  
414

**Figure 4. Typical NMDA receptor developmental trajectory in *Cdk15*<sup>-/-</sup> rats.** **A** – NMDAR/AMPA ratio in WT and *Cdk15*<sup>-/-</sup> rats aged P7 to P22. **B** - NMDAR decay time constant over development. **C** – Representative traces of NMDA receptor-mediated EPSCs in the presence or absence (baseline) of the GluN2B antagonist Ro 25-6981. **D** – NMDA receptor-mediated EPSC amplitude for individual cells before (full circles) and after (clear circles) Ro 25-6981 application, with recordings from each cell connected by a straight line across 3 age groups examined. **E** – Percentage of NMDA receptor current blocked by RO 25-6981 based on cells shown in D. All data shown as mean ± SEM, dots represent animal averages (except in D).

415 In addition to NMDA receptors, altered AMPA receptor subunit composition has been suggested as a  
416 potential mechanism underlying enhanced early-phase LTP in mouse models of CDD, where higher  
417 levels of calcium permeable (CP) GluA2-lacking AMPA receptors were observed (Yennawar, White,  
418 and Jensen 2019). To assess the relative abundance of CP-AMPA receptors, we recorded AMPA  
419 receptor-mediated EPSCs by stimulating the Schaffer collateral inputs to CA1 and performing whole cell  
420 voltage clamp recordings from CA1 pyramidal cells in the presence of NMDA receptor and GABA-A  
421 receptor blockers (Figure 5). AMPA receptor-mediated EPSCs were recorded at a range of voltages



422 from -80 mV to +40 mV in order to assess their current-voltage (I-V) relationship and rectification index.  
423 To maintain the intracellular polyamine block that confers inward rectification characteristic of CP-AMPA  
424 receptors, the intracellular solution in the recording pipette contained 0.1 mM of spermine (Kamboj,  
425 Swanson, and Cull-Candy 1995).  
426 AMPA receptor-mediated EPSCs exhibited a linear current-voltage I-V relationship in WT neurons  
427 (Figure 5B, B'; linear regression:  $y = 0.0121x - 0.0729$ ,  $r^2=0.88$ ), indicating no inward rectification  
428 and consistent with the high GluA2 expression in CA1 pyramidal cells (He et al., 1998, Pickard *et al.*,  
429 2000). In *Cdk15*<sup>-/-</sup> rats this linear relationship was maintained (linear regression:  $y = 0.0133x -$   
430  $0.0002$ ,  $r^2=0.90$ ) and did not differ to that observed in WT rats (Figure 5B, B';  $F(1,143) = 2.3$ ,  $p = 0.13$ ,  
431 Sum-of-least squares F-test).

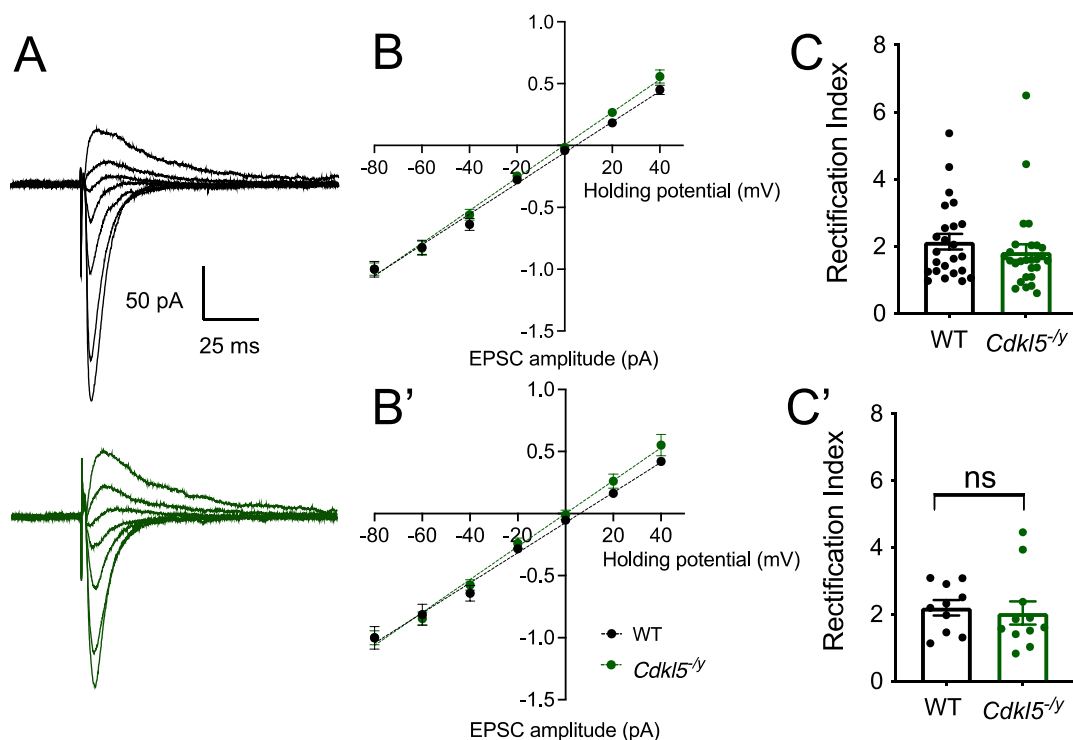

432

433 **Figure 5. Unaltered AMPA receptor-mediated EPSC I-V relationship in CA1 pyramidal cells of**  
434 ***Cdk15*<sup>-/-</sup> rats.** **A** – Representative traces of AMPA receptor-mediated currents from WT (upper, black)  
435 and *Cdk15*<sup>-/-</sup> (lower, green) recorded over a range of holding potentials (-80mV to +40 mV) in the  
436 presence of 0.1mM spermine in the intracellular solution. **B, B'** – I-V relationship AMPA receptor-  
437 mediated EPSC normalised to EPSC amplitude at -80 mV holding potential (Genotype effect:  
438  $F_{1,11}=1.794$ ,  $p = 0.21$ , Two-way ANOVA) **C** – Rectification index calculated as the ratio of EPSC  
439 amplitude at -60 mV over +40 mV. Data shown as mean  $\pm$  SEM, data shown for individual cells (B, C)  
440 and animal averages (B', C') (WT n = 24 cells / 10 rats ; *Cdk15*<sup>-/-</sup>: n = 27 cells / 11 rats)).

441

442 The rectification index calculated as the ratio of EPSC amplitude at the holding potentials of -60 mV  
443 and +40 mV was also unchanged in the absence of CDKL5 (WT:  $2.19 \pm 0.23$ , *Cdkl5*<sup>-/-</sup>:  $2.04 \pm 0.35$ ,  
444  $p=0.33$  LMM). Together these data suggest that NMDA receptor and AMPA receptor mediated synaptic  
445 transmission are not affected in *Cdkl5*<sup>-/-</sup> rats and therefore alterations to NMDA receptor and AMPA  
446 receptor are unlikely to contribute to the enhanced LTP observed in the rat model of CDD.

#### 447 ***Reduced mEPSC frequency and unaltered paired-pulse ratio in Cdkl5<sup>-/-</sup> rats***

448 In addition to post-synaptic mechanisms mediated by NMDA receptors and AMPA receptors, altered  
449 pre-synaptic function can contribute to abnormal synaptic transmission and altered synaptic plasticity.  
450 Indeed, CDKL5 has been implicated at the pre-synapse including through phosphorylation of the pre-  
451 synaptic protein amphiphysin-1 (Sekiguchi et al., 2013) and through its interaction with shootin1 which  
452 is thought to underlie normal axon specification (Nawaz et al. 2016). Moreover, reduced expression of  
453 the pre-synaptic marker synaptophysin has been reported in cellular models of CDD (Ricciardi et al.  
454 2012; Fuchs et al. 2018). To assess further synaptic transmission in the absence of CDKL5, we  
455 recorded mEPSCs (Figure 6) and found a 30% reduction in mEPSC frequency from  $5.43 \pm 0.49$  Hz in  
456 WT to  $3.78 \pm 0.34$  Hz in *Cdkl5*<sup>-/-</sup> rats (Figure 6 B-B', LM  $p=0.02$ ). This was accompanied by unaltered  
457 mEPSC amplitudes (Figure 6C-C', WT:  $11.51 \pm 0.82$  pA, *Cdkl5*<sup>-/-</sup>:  $10.88 \pm 0.69$  pA, LMM  $p=0.64$ ).

458 As paired-pulse ratios (PPR) are commonly used to assess pre-synaptic release probability (Debanne  
459 et al. 1996), we next examined PPR of evoked EPSCs to determine whether the reduction in mEPSC  
460 frequency observed was a consequence of reduced pre-synaptic release probability. In WT rats, 2  
461 pulses of electrical stimulation of Schafer collateral inputs to CA1 50 ms apart, resulted in a facilitating  
462 postsynaptic response with a PPR of  $1.71 \pm 0.11$ . In *Cdkl5*<sup>-/-</sup> rats, EPSCs exhibited a PPR of  $1.97 \pm$   
463  $0.18$ , unaltered relative to WT (Figure 6F-G', LMM  $p=0.33$ ).

464

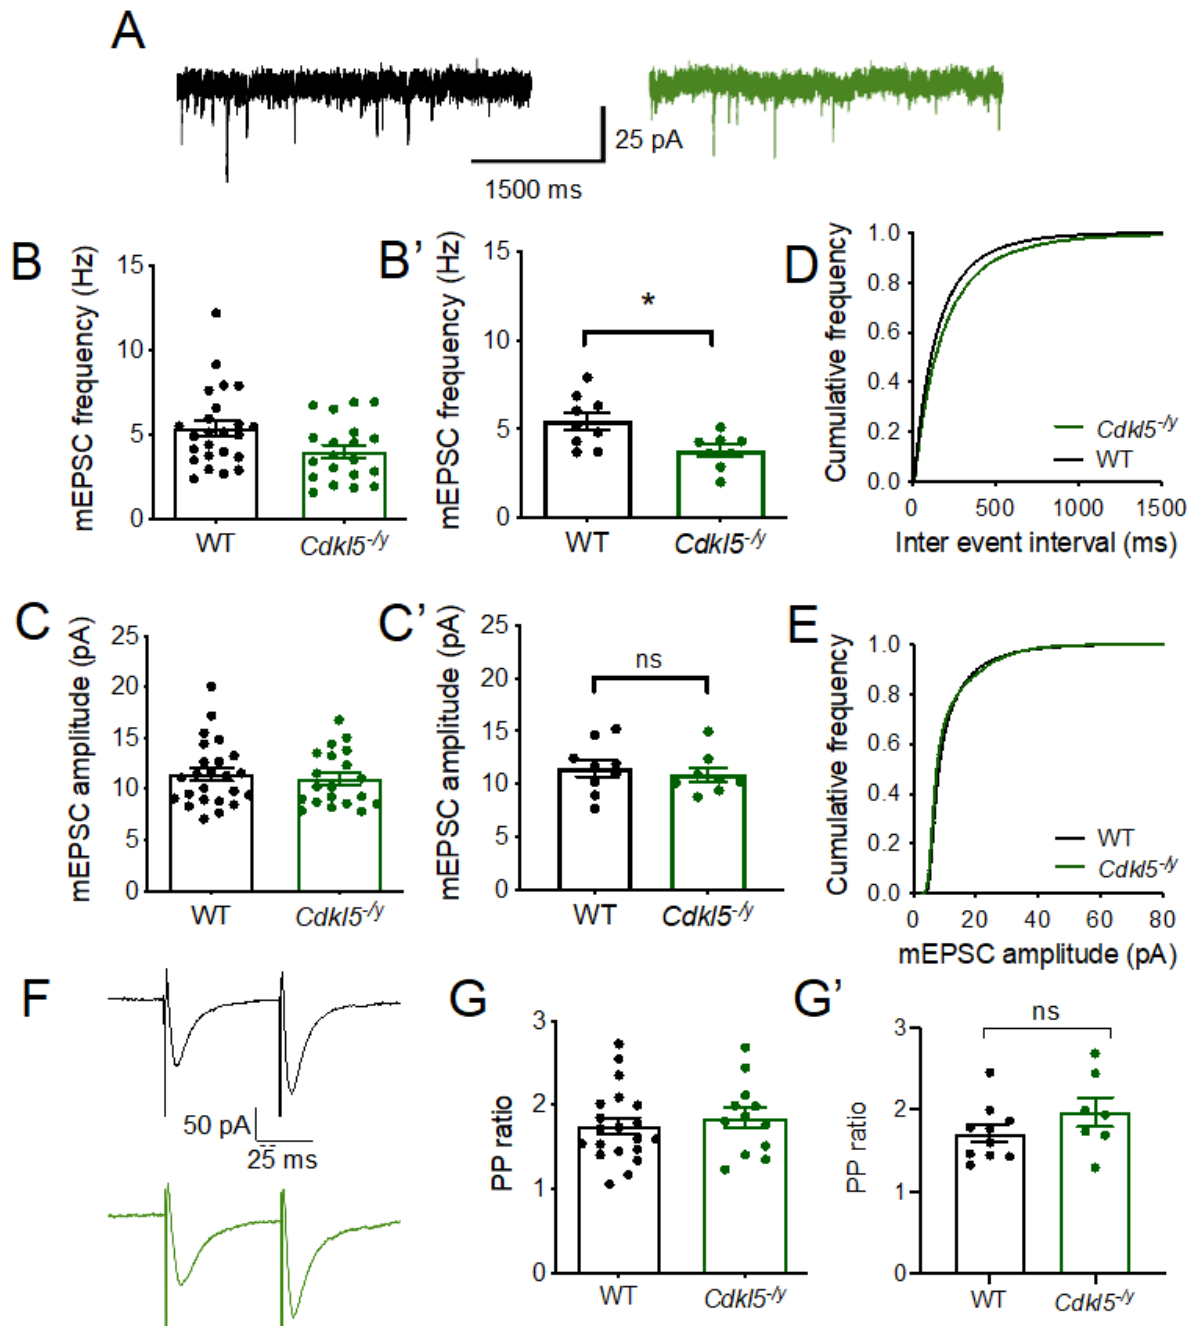

465  
 466 **Figure 6. Reduced miniEPSC frequency and typical PPR in CA1 pyramidal cells from *Cdk15*<sup>-/-</sup>**  
 467 **rats.** **A** - Representative traces of mEPSC recordings from WT (left, black) and *Cdk15*<sup>-/-</sup> (right, green)  
 468 rats. **B-B'** mEPSC frequency. **C-C'** mEPSC amplitude: WT n = 24 cells / 9 rats, *Cdk15*<sup>-/-</sup> n = 20 cells / 8  
 469 rats. **D** - Cumulative distribution of inter-event interval. **E** - Cumulative distribution of mEPSC amplitude.  
 470 **F** - Representative traces of EPSCs evoked by PP stimulation of Schafer collateral inputs to CA1  
 471 pyramidal cells from WT (upper, black) and *Cdk15*<sup>-/-</sup> rats (lower, green). **G** - PPR of evoked (WT n= 20  
 472 cells / 10 rats, *Cdk15*<sup>-/-</sup> n= 10 cells / 7 rats) Data in bar charts shown as mean ± SEM (dots represent  
 473 individual cells (B, C, G) or corresponding animal averages (B', C', D').

474

475

476 **Typical dendritic morphology but increased spine density in basal dendrites of CA1 pyramidal**  
477 **cells**

478 Altered dendritic morphology has previously been reported in mouse models of CDD across multiple  
479 brain areas (Okuda et al. 2018; Tang et al. 2017; Amendola et al. 2014). Moreover, dendritic  
480 morphology can have a profound impact on processing of synaptic inputs and consequently on circuit  
481 level function (Vetter, Roth, and Häusser 2001; Mainen and Sejnowski 1996). As such, we  
482 reconstructed biocytin-filled cells in order to examine dendritic arborisation and spine density in *Cdkl5*  
483 <sup>-/-</sup> rats (Figure 6, 7). In WT rats, biocytin-filled cells exhibited typical CA1 pyramidal cell morphology  
484 (Figure 7.A, (Amaral and Witter 1989; Bannister and Larkman 1995)). When examining the Sholl profile  
485 we found cell morphology to be unaltered in *Cdkl5*<sup>-/-</sup> rats relative to WT controls (Figure 7.B, Two-way  
486 ANOVA on animal averages, Interaction:  $F_{76,912} = 2.094$ ,  $p < 0.001$ , genotype effect:  $p = 0.38$ ). Total  
487 dendritic length (Figure 6C, C', WT:  $9882 \pm 707 \mu\text{m}$ , *Cdkl5*<sup>-/-</sup>:  $9455 \pm 610 \mu\text{m}$ , Two-tailed T Test:  
488  $T_{12} = 0.46$ ,  $p = 0.66$ ) as well as total length of apical (Figure 7D, D' WT:  $6622 \pm 520 \mu\text{m}$ , *Cdkl5*<sup>-/-</sup>:  $5795 \pm$   
489  $519 \mu\text{m}$ , Two-tailed T Test:  $T_{12} = 1.12$ ,  $p = 0.28$ ) and basal dendrites (Figure 7E, E', WT:  $3260 \pm 257 \mu\text{m}$ ,  
490 *Cdkl5*<sup>-/-</sup>:  $3660 \pm 275 \mu\text{m}$ , Two-tailed T Test:  $T_{12} = 1.06$ ,  $p = 0.31$ ) were unchanged, indicating that overall  
491 dendritic complexity is not affected by the lack of CDKL5.

492 Despite no overall changes in gross dendritic morphology, we found a 19% increase in spine density in  
493 the basal dendrites of CA1 pyramidal cells from *Cdkl5*<sup>-/-</sup> rats (Figure 8B-B',  $19.18 \pm 1.18$  spines/ $10 \mu\text{m}$ )  
494 relative to WT controls ( $16.08 \pm 0.98$  spines/ $10 \mu\text{m}$ , LMM  $p = 0.04$ ). Spine density did not differ between  
495 genotypes in the apical dendrites, oblique (Figure 8C-C', WT:  $20.02 \pm 1.76$  spines/ $10 \mu\text{m}$ , *Cdkl5*<sup>-/-</sup>:  
496  $18.30 \pm 0.92$  spines/ $10 \mu\text{m}$ , LMM,  $p = 0.71$ ) or tuft (Figure 8D-D', WT:  $8.71 \pm 0.78$  spines/ $10 \mu\text{m}$ , *Cdkl5*<sup>-/-</sup>:  
497  $8.26 \pm 0.82$  spines/ $10 \mu\text{m}$  LMM  $p = 0.71$ ).

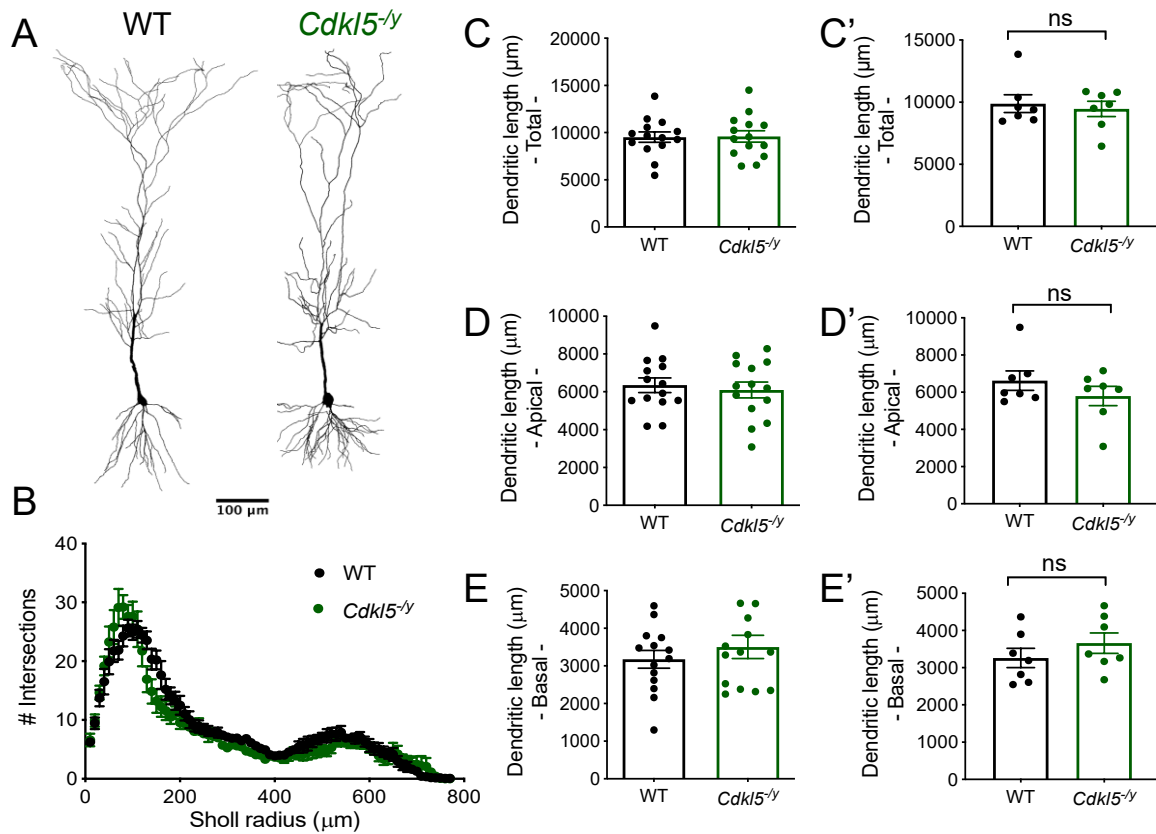

498  
499

500 **Figure 7. CA1 pyramidal cell morphology and spine density across multiple dendritic**  
 501 **compartments.** A – Example reconstruction of CA1 pyramidal cells from WT and *Cdk15<sup>-/-</sup>* rats filled with  
 502 biocytin during whole cell patch clamp recordings. B – Sholl analysis of the dendritic arborisation (Two  
 503 way ANOVA: Interaction:  $F_{76,912} = 2.094$ ,  $p < 0.001$ , genotype effect  $p = 0.38$ ). C – Total dendritic length,  
 504 D – total length of basal dendrites, E – total length of apical dendrites. Data shown as mean  $\pm$  SEM  
 505 (WT -  $n=14$  cells/7 rats, *Cdk15<sup>-/-</sup>* -  $n=14$  cells/7 rats, dots represent animal averages, all  $p$  values  $> 0.05$ ,  
 506 Two tailed t-test).

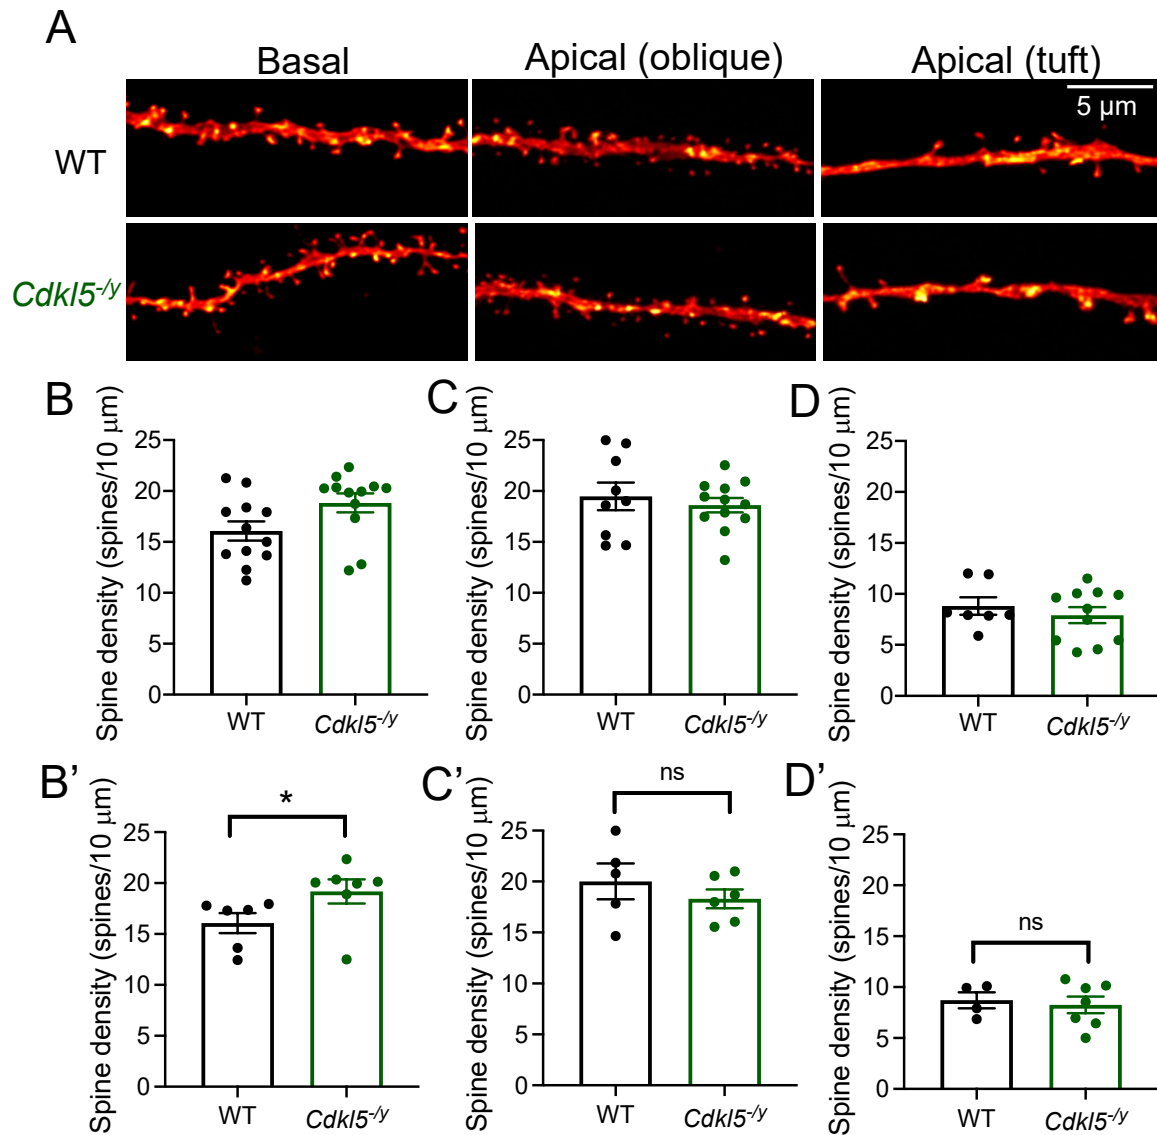

507

508 **Figure 8. Spine density across dendritic compartments of CA1 pyramidal cells.** A –  
 509 Representative segments of basal and apical (oblique and tuft) dendrites from CA1 pyramidal cells filled  
 510 during whole-cell patch-clamp recordings. B – Spine density in basal dendrites (WT: n = 12 cells/6 rats,  
 511 *Cdk15<sup>-/-</sup>*: n = 12 cells / 7 rats). C – Spine density in apical oblique dendrites (WT: n = 9 cells / 6 rats,  
 512 *Cdk15<sup>-/-</sup>*: n = 12 cells / 6 rats). D – Spine density in apical tuft dendrites (WT: n = 7 cells/4 rats, *Cdk15<sup>-/-</sup>*:  
 513 n = 11 cells / 7 rats). Data shown as mean ± SEM, dots represent cell (B, C, D) or animal averages (B',  
 514 C', D'). \*p<0.05, ns p>0.05 LMM.

515

#### 516 **Unchanged relative abundance of silent synapses in *Cdk15<sup>-/-</sup>* rats**

517 To determine whether the reduced mEPSC frequency and increased spine density observed resulted  
 518 from an increase in the relative abundance of NMDA receptor-only silent synapses, we used minimal  
 519 stimulation of Schaffer collateral inputs to activate a single or a small number of synapses onto CA1,  
 520 thus resulting EPCs or failures of synaptic transmission when recording AMPA receptor-mediated

521 responses at a hyperpolarised holding potential (-70 mV). When the neuron is depolarised to +40 mV,  
522 mixed AMPA receptor and NMDA receptor-containing synapses as well as NMDA receptor-only  
523 containing synapses are activated (Figure 9A-B). Under these conditions, the ratio of response  
524 probability at +40 mV relative to -70 mV allows for an estimation of the relative abundance of silent  
525 synapses (Isaac et al. 1997). When recording at -70 mV, response probability was similar for WT and  
526 *Cdk15<sup>-/-</sup>* rats (WT:  $0.66 \pm 0.02$ , *Cdk15<sup>-/-</sup>*  $0.73 \pm 0.03$ ,  $p=0.63$ ). The response probability increased similarly  
527 in both genotypes when recording at +40 mV (WT:  $0.79 \pm 0.03$ , *Cdk15<sup>-/-</sup>*  $0.89 \pm 0.02$ ,  $p=0.21$  LMM), thus  
528 revealing the presence of silent synapses (Figure 9C). The similar ratio of response probability across  
529 genotypes (Figure 9D, WT:  $1.23 \pm 0.07$ , *Cdk15<sup>-/-</sup>*  $1.21 \pm 0.08$ ,  $p=0.83$  GLMM) is consistent with low  
530 levels of silent synapses in CA1 pyramidal cells (Racca et al. 2000) and indicates that the abundance  
531 of silent synapses is unaltered in the absence of CDKL5. Overall, these data suggest that altered  
532 abundance of silent synapses does not contribute to the LTP and mEPSC phenotypes observed in  
533 *Cdk15<sup>-/-</sup>* rats.

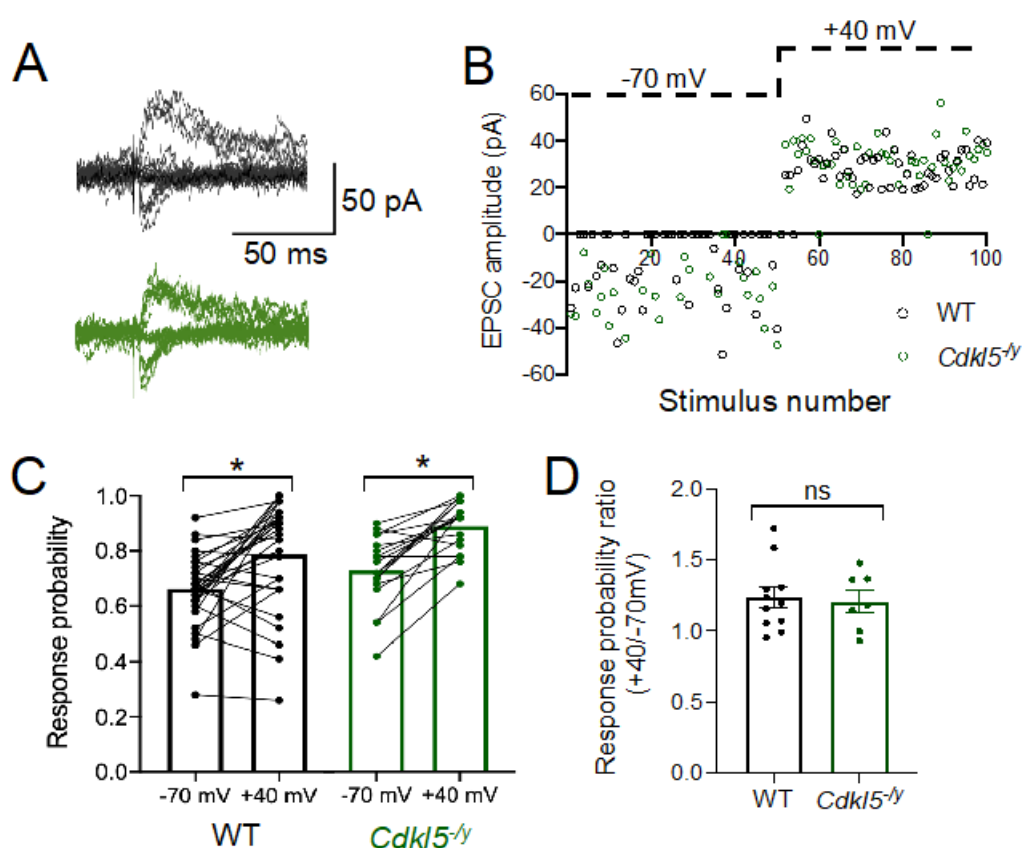

534  
535 **Figure 9. Minimal stimulation of CA3 inputs to CA1 pyramidal cells reveal no difference in silent**  
536 **synapses in *Cdk15<sup>-/-</sup>* rats.** **A** - Representative traces of EPSCs recorded at -70 mV and +40 mV evoked  
537 by minimal stimulation of Schaffer collaterals. **B** - Example time-course of synaptic responses  
538 throughout a single WT and *Cdk15<sup>-/-</sup>* recording upon Schaffer collateral stimulation. **C** - Response  
539 probability at -70 mV and +40 mV (data shown as cells, values for each cell connected by a black line.

540 Two-way ANOVA Genotype effect:  $F_{1,46} = 5.16$ ,  $p = 0.03$ , Holding potential effect:  $F_{1,46}=38.50$ ,  $p$   
 541  $<0.0001$ ). **D** - Ratio of the response probability at +40mV and -70 mV following minimal stimulation of  
 542 Schaffer collaterals. (WT n= 30 cells / 11 rats, *Cdk15*<sup>-/-</sup> n=18 cells / 7 rats).

### 543 **CA1 pyramidal cells exhibit typical cellular excitability**

544 In addition to synaptic transmission, we examined cellular excitability of CA1 pyramidal cells, as altered  
 545 cellular excitability has been suggested to contribute to circuit level dysfunction in ASD/ID and epilepsy  
 546 (Contractor, Klyachko, and Portera-Cailliau 2015; Clement et al. 2012).

547 CA1 pyramidal cells from WT rats exhibited a hyperpolarised resting membrane potential, fast  
 548 membrane time constant and low input resistance (Table 1), in line with previous studies (Spruston and  
 549 Johnston 1992; Staff et al. 2000). CA1 Pyramidal cells required  $206 \pm 20$  pA of current injection to elicit  
 550 the first AP (rheobase, Figure 10C-C'), and the number of APs fired increased with current injection  
 551 thereafter until reaching a firing frequency of  $22 \pm 2$  Hz in response to the maximum current injection  
 552 step (400 pA, Figure 10A, D-D'). In *Cdk15*<sup>-/-</sup> rats, passive membrane properties (Table 1, Figure 10B-  
 553 B'), rheobase current (LMM,  $p=0.91$ , Figure 10 C-C') and overall AP firing in response to increasing  
 554 current steps (Two-Way ANOVA  $F_{16,208}=0.12$ , genotype effect:  $p=0.66$ , Figure 10D-D'), and were  
 555 unaffected. These data indicate intrinsic neuronal excitability is unaffected in *Cdk15*<sup>-/-</sup> rats.

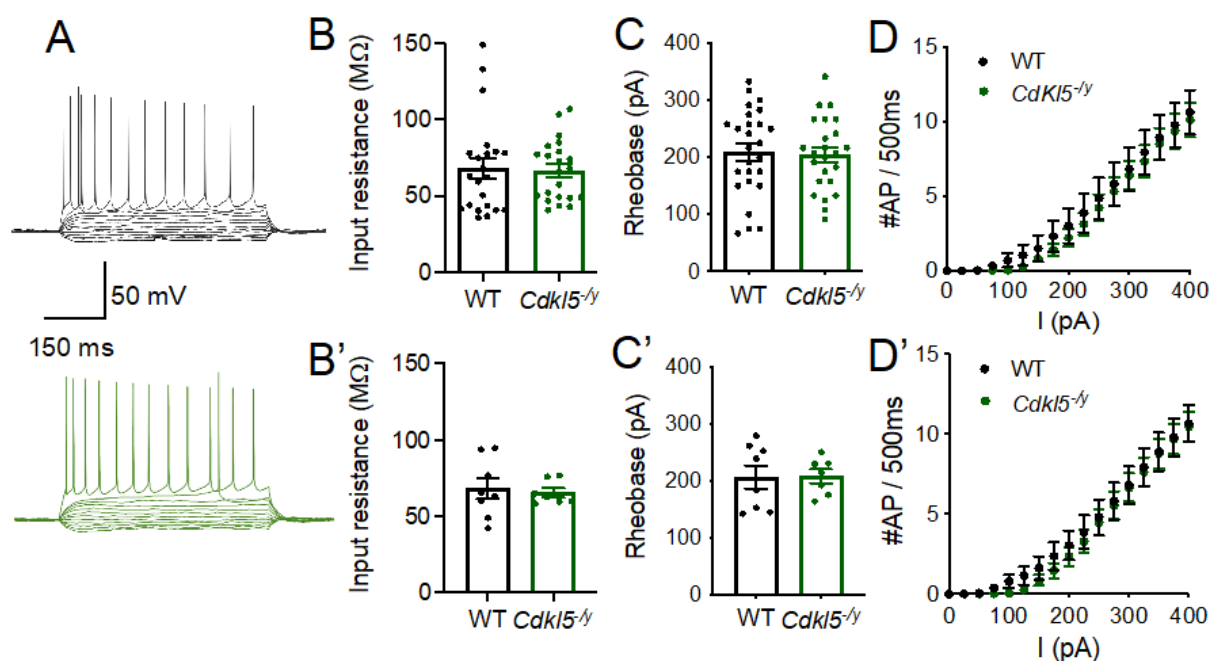

556

557 **Figure 10. Typical excitability of CA1 pyramidal cells.** **A** - Representative traces of whole cell  
 558 recordings from WT (black, upper) and *Cdk15*<sup>-/-</sup> (green, lower) CA1 pyramidal cells in response to  
 559 subsequent 25 pA steps. Traces shown from -100 pA to rheobase-1 and for the maximum firing  
 560 frequency ( $I = 400$  pA). **B**, **B'** - Input resistance. **C**, **C'** - rheobase current. **D**, **D'** - Action potential  
 561 discharge in response to 500 ms long 25 pA current steps up to 400 pA (Two-way ANOVA genotype



562 effect  $F_{16,208}=0.12$ ,  $p = 0.66$ ). Data shown as mean  $\pm$  SEM (WT –  $n = 26$  cells/8 rats,  $Cdkl5^{y/y}$  –  $n =$   
563 24 cells/7 rats, dots represent single cells (B, D, D) or animal averages (B', C', D').

564

565 **Table 1. Passive membrane properties of CA1 pyramidal cells are unaltered in  $Cdkl5^{y/y}$  rats**

| Physiological property          | WT              | $Cdkl5^{y/y}$   | p value (LMM) |
|---------------------------------|-----------------|-----------------|---------------|
| Resting membrane potential (mV) | $-69.8 \pm 1.2$ | $-69.2 \pm 1.1$ | 0.56          |
| Input resistance (M $\Omega$ )  | $68.1 \pm 6.8$  | $65.4 \pm 3.0$  | 0.64          |
| Membrane time constant (ms)     | $19.1 \pm 1.0$  | $20.7 \pm 2.1$  | 0.64          |
| Capacitance (pF)                | $299 \pm 23$    | $331 \pm 35$    | 0.69          |

566

## 567 Discussion

568 In this study we described and validated a novel rat model of CDD, whereby targeting exon 8 of the  
569  $Cdkl5$  gene resulted in complete absence of CDKL5 protein. Extracellular field recordings revealed  
570 enhanced LTP in the hippocampus of  $Cdkl5^{y/y}$  rats. However, extensive electrophysiological and  
571 biochemical characterization of NMDA receptors and AMPA receptors revealed no alteration in the  
572 functional properties of these receptors or the expression of their respective subunits. Further analysis  
573 of synaptic transmission in  $Cdkl5^{y/y}$  rats revealed a reduction in mEPSC frequency however, this finding  
574 was not accompanied by a change in PPR or an altered expression of hippocampal presynaptic  
575 proteins. Morphological characterisation of CA1 pyramidal cells with Sholl analysis revealed typical  
576 dendritic branching in  $Cdkl5^{y/y}$  rats. However, spine density was altered in a dendritic domain specific  
577 manner, with basal dendrites exhibiting higher spine density in  $Cdkl5^{y/y}$  rats relative to WT, while spine  
578 density was unchanged in apical dendrites. Despite this increase in spine density and reduced mEPSC  
579 frequency, minimal stimulation experiments revealed unaltered abundance of silent synapses in  $Cdkl5^{y/y}$   
580 rats. Cellular excitability was also largely unaffected in the absence of CDKL5.

### 581 *Mechanisms underlying enhanced hippocampal LTP are not conserved across mouse and rat models* 582 *of CDD*

583 In this study we found enhanced LTP in the hippocampus of  $Cdkl5^{y/y}$  rats, suggesting a role of CDKL5  
584 in synaptic plasticity in this brain region. Whilst enhanced LTP has previously been reported in mouse  
585 models of CDD (Okuda et al. 2017; Yennawar, White, and Jensen 2019), the mechanisms previously  
586 suggested to contribute to this phenotype in mice are not translated to the rat model used in this study.  
587 In contrast to Okuda *et al.*, 2017, we did not observe alteration in NMDAR/AMPA ratio, NMDA receptor  
588 kinetics or subunit expression. Moreover, the developmental trajectory of NMDA receptor function and  
589 subunit expression can have long lasting impact on circuit level function and had not yet been

590 characterised in rodent models of CDD. In this study we show NMDA receptor development to be  
591 unaffected in *Cdkl5*<sup>-y</sup> rats.

592 Furthermore, the contribution of GluA2 lacking AMPA receptors to synaptic transmission is also  
593 unaffected in *Cdkl5*<sup>-y</sup> rats contrary to what has been described in mouse models of CDD (Yennawar,  
594 White, and Jensen 2019). Indeed, the linear I-V relationship of AMPA receptor mediated EPSCs  
595 observed in WT and *Cdkl5*<sup>-y</sup> rats is consistent with the known high expression of GluA2 subunit in CA1  
596 pyramidal cells (He et al., 1998), which confers low calcium permeability and no inward rectification  
597 (Jonas and Sakmann, 1992; Jonas et al., 1994).

598 In addition to species differences, other factors can contribute to the discrepancies observed between  
599 our findings and previous studies. Namely the ages of the animals tested and the nature of the genetic  
600 alteration leading to lack of CDKL5. In this study we focused on early post-natal development (P7  
601 onwards) and juvenile ages (P28-35) due to the neurodevelopmental nature of CDD. However, the vast  
602 majority of studies conducted in pre-clinical models of CDD have focused on adult mice (*i.e.* older than  
603 2 months, (Tang et al. 2017, 2019; Okuda et al. 2017; Amendola et al. 2014; Okuda et al. 2018; Wang  
604 et al. 2012)). Moreover, altered NMDA receptor function has been reported in constitutive knock out of  
605 *Cdkl5* achieved by targeting exon 2 (Okuda et al. 2017), calcium permeable AMPA receptors have been  
606 implicated in the R59X mutation knock in mouse model (Yennawar, White, and Jensen 2019), whilst  
607 the rat model used in this study results from targeting exon 8. Interestingly, discrepancies in behavioural  
608 phenotypes have been described across the variety of mouse models generated so far (Zhu and Xiong  
609 2019).

610 Our findings suggest ionotropic glutamate receptor function and expression of synaptic proteins is intact  
611 in *Cdkl5*<sup>-y</sup> rats, therefore the cellular mechanisms underlying enhanced LTP in the rat model of CDD  
612 are yet to be understood. Work elucidating CDKL5 targets is still in its early stages, and there is no  
613 evidence of CDKL5 directly regulating signalling cascades downstream from LTP induction. However,  
614 downregulation of the mTOR signalling pathway has been reported across different mouse models of  
615 CDD (Schroeder et al., 2019; Amendola et al., 2014; Wang et al., 2012). Furthermore, altered mTOR  
616 signalling has been implicated in various other models of ASD/ID which also present with synaptic  
617 plasticity phenotypes (reviewed in Winden et al. (2018)), as such examination of this pathway might  
618 provide insight into a potential mechanism for the synaptic plasticity phenotype in *Cdkl5*<sup>-y</sup> rats.

## 619 *Excitatory synaptic transmission*

620 In this study we report a reduction in mEPSC frequency in *Cdkl5<sup>-/-</sup>* rats. mEPSCs are synaptic events  
621 resulting from the stochastic release of a single vesicle of neurotransmitter. Whilst mEPSC amplitude  
622 is a proxy for the number of receptors in the postsynaptic membrane, mEPSC frequency is a correlate  
623 for presynaptic release probability and/or synapse numbers. PPR is typically used to infer about  
624 presynaptic release probability (Debanne et al., 1996; Dobrunz et al., 1997), however the relationship  
625 between PPR and release probability is complex with studies showing that PPR can be maintained  
626 even when release probability is altered (Manita et al. 2007; Burke et al. 2018). In this study we find  
627 PPR to be unaltered at Schaffer Collateral synapses in CA1 in *Cdkl5<sup>-/-</sup>* rats. Whilst this does not exclude  
628 the possibility of a presynaptic effect, together with unaltered expression levels of presynaptic proteins,  
629 these data suggest that release probability is unlikely to be affected in the hippocampus of *Cdkl5<sup>-/-</sup>* rats.

630 As the reduction in mEPSC frequency was accompanied by an increase in spine density in basal  
631 dendrites, we used minimal stimulation to address the hypothesis that *Cdkl5<sup>-/-</sup>* rats exhibit a greater  
632 abundance of silent synapses. Furthermore, altered abundance of silent synapses has previously been  
633 suggested to underlie abnormal synaptic plasticity in other models of ASD/ID with co-occurring epilepsy  
634 (Harlow et al. 2010). The response probability observed upon minimal stimulation of Schaffer Collateral  
635 inputs to CA1 was consistent with the prevalence of silent synapses expected for CA1, based on  
636 anatomical studies (Racca et al., 2000), but no genotypic differences were found, indicating that the  
637 reduction in mEPSC frequency we observe cannot be explained by an increase in functionally silent  
638 synapses. Nonetheless, in this study we examined spine densities in biocytin filled cells as an estimate  
639 for number of excitatory synapses, however no synaptic markers were used to determine whether those  
640 spines are putative functional synapses. Therefore, it is plausible that despite an increase in spine  
641 density, *Cdkl5<sup>-/-</sup>* rats do not exhibit an increased number of functional synapses but rather a reduction,  
642 thus explaining the reduction in mEPSC frequency observed. In fact, knock down of CDKL5 in neuronal  
643 cultures resulted in increased spine densities accompanied by a reduction in puncta of synaptic markers  
644 and reduced mEPSC frequency (Ricciardi et al. 2012).

## 645 **Limitations**

646 The study of CDD in rodents has been clouded by the lack of a seizure phenotype in the models  
647 developed so far. Whilst children with CDD present with early-onset epilepsy (Bahi-Buisson and

648 Bienvenu 2012), this feature of CDD is not translated to rodent models of the disorder (Wang et al.  
649 2012; Amendola et al. 2014; Okuda et al. 2017), including the rat model described in this study. Indeed  
650 spontaneous seizures have only been observed in aged heterozygous female mice (> 300 days), with  
651 the burden of epileptic spasms depending on the nature of the genetic alteration (Mulcahey et al. 2020).  
652 The lack of a seizure phenotype in ours and other models generated thus far casts doubts on whether  
653 rodent models can be useful in understanding the cellular and circuit level alterations underlying  
654 epilepsy in CDD. Nonetheless, CDKL5 protein function is still poorly understood and rodent models can  
655 provide useful tool to understanding the role of CDKL5 in neurons at the molecular and cellular level.  
656 The contribution of this study to the understanding of CDD is limited by the fact that only hemizygous  
657 male rats (where CDKL5 is completely absent) were examined, whilst most cases of CDD occur in  
658 heterozygous females. Clinically, the spectrum of severity is similar in males and females (Demarest et  
659 al., 2019; Siri et al., 2021; MacKay et al., 2021). However, studying CDKL5 function in heterozygous  
660 females is complicated by the random X chromosome inactivation leading to mosaicism. The lack of  
661 reliable antibodies to identify CDKL5 positive and negative cells and the lack of reporter lines where  
662 this can be done in real time pose a significant obstacle to determine the role of CDKL5 in neuronal  
663 function in heterozygous females. Therefore, the study of hemizygous males can provide a useful tool  
664 to understand CDKL5 function in a simplified system.

665

## 666 **Conclusion**

667 This study described a novel rat model of CDD, of value to understand the role of CDKL5 in  
668 neurodevelopment in rodents. Moreover, the generation of this rat model provides valuable tool to the  
669 CDD research community. In combination with the existing mouse models, the *Cdkl5* KO rat can be  
670 used to identify robust cross species phenotypes that can be used as biomarkers when assessing  
671 potential therapeutics in preclinical models of CDD.

672 This study provides evidence of a role of CDKL5 in excitatory synaptic transmission and synaptic  
673 plasticity in the hippocampus however the underlying mechanisms by which loss CDKL5 results in  
674 enhanced LTP and reduced mEPSC frequency remain to be elucidated.

## 675 **References:**

676 Amaral, D.G., and M.P. Witter. 1989. "The Three-Dimensional Organization of the Hippocampal

- 677 Formation: A Review of Anatomical Data.” *Neuroscience* 31 (3): 571–91.  
678 [https://doi.org/10.1016/0306-4522\(89\)90424-7](https://doi.org/10.1016/0306-4522(89)90424-7).
- 679 Amendola, Elena, Yang Zhan, Camilla Mattucci, Enrico Castroflorio, Eleonora Calcagno, Claudia  
680 Fuchs, Giuseppina Lonetti, et al. 2014. “Mapping Pathological Phenotypes in a Mouse Model of  
681 CDKL5 Disorder.” *PLoS ONE* 9 (5): 5–16. <https://doi.org/10.1371/journal.pone.0091613>.
- 682 Anderson, William W., and Graham L. Collingridge. 2007. “Capabilities of the WinLTP Data Acquisition  
683 Program Extending beyond Basic LTP Experimental Functions.” *Journal of Neuroscience*  
684 *Methods* 162 (1–2): 346–56. <https://doi.org/10.1016/j.jneumeth.2006.12.018>.
- 685 Bahi-Buisson, N., and T. Bienvenu. 2012. “CDKL5-Related Disorders: From Clinical Description to  
686 Molecular Genetics.” *Molecular Syndromology* 2 (3–5): 137–52.  
687 <https://doi.org/10.1159/000331333>.
- 688 Baltussen, Lucas L, Priscilla D Negraes, Margaux Silvestre, Suzanne Claxton, Max Moeskops,  
689 Evangelos Christodoulou, Helen R Flynn, Ambrosius P Snijders, Alysson R Muotri, and Sila K  
690 Ultanir. 2018. “Chemical Genetic Identification of CDKL 5 Substrates Reveals Its Role in  
691 Neuronal Microtubule Dynamics.” *The EMBO Journal* 37 (24): 1–18.  
692 <https://doi.org/10.15252/embj.201899763>.
- 693 Bannister, N. J., and A. U. Larkman. 1995. “Dendritic Morphology of CA1 Pyramidal Neurones from the  
694 Rat Hippocampus: II. Spine Distributions.” *Journal of Comparative Neurology* 360 (1): 150–60.  
695 <https://doi.org/10.1002/cne.903600111>.
- 696 Bates, Douglas, Martin Mächler, Ben Bolker, and Steve Walker. 2014. “Fitting Linear Mixed-Effects  
697 Models Using Lme4,” June.
- 698 Burke, Kenneth J, Caroline M Keeshen, Kevin J Bender, Kenneth J Burke, Caroline M Keeshen, and  
699 Kevin J Bender. 2018. “Two Forms of Synaptic Depression Produced by Differential  
700 Neuromodulation of Presynaptic Article Two Forms of Synaptic Depression Produced by  
701 Differential Neuromodulation of Presynaptic Calcium Channels.” *Neuron* 99 (5): 969-984.e7.  
702 <https://doi.org/10.1016/j.neuron.2018.07.030>.
- 703 Clement, James P., Massimiliano Aceti, Thomas K. Creson, Emin D. Ozkan, Yulin Shi, Nicholas J.  
704 Reish, Antoine G. Almonte, et al. 2012. “Pathogenic SYNGAP1 Mutations Impair Cognitive  
705 Development by Disrupting Maturation of Dendritic Spine Synapses.” *Cell* 151 (4): 709–23.  
706 <https://doi.org/https://doi.org/10.1016/j.cell.2012.08.045>.

- 707 Clements, J. D., and J. M. Bekkers. 1997. "Detection of Spontaneous Synaptic Events with an Optimally  
708 Scaled Template." *Biophysical Journal* 73 (1): 220–29. [https://doi.org/10.1016/S0006-](https://doi.org/10.1016/S0006-3495(97)78062-7)  
709 3495(97)78062-7.
- 710 Contractor, Anis, Vitaly A. Klyachko, and Carlos Portera-Cailliau. 2015. "Altered Neuronal and Circuit  
711 Excitability in Fragile X Syndrome." *Neuron* 87 (4): 699–715.  
712 <https://doi.org/10.1016/J.NEURON.2015.06.017>.
- 713 Debanne, D, N C Guérineau, B H Gähwiler, and S M Thompson. 1996. "Paired-Pulse Facilitation and  
714 Depression at Unitary Synapses in Rat Hippocampus: Quantal Fluctuation Affects Subsequent  
715 Release." *The Journal of Physiology* 491 (1): 163–76.  
716 <https://doi.org/10.1113/jphysiol.1996.sp021204>.
- 717 Demarest et al. (2021) CDKL5 deficiency disorder: Relationship between genotype, epilepsy, cortical  
718 visual impairment, and development. *Epilepsia* 60:1733-1742.
- 719 Dunkley, Peter R., Paula E. Jarvie, and Phillip J. Robinson. 2008. "A Rapid Percoll Gradient Procedure  
720 for Preparation of Synaptosomes." *Nature Protocols* 3 (11): 1718–28.  
721 <https://doi.org/10.1038/nprot.2008.171>.
- 722 Fehr, Stephanie, Meredith Wilson, Jenny Downs, Simon Williams, Alessandra Murgia, Stefano Sartori,  
723 Marilena Vecchi, et al. 2013. "The CDKL5 Disorder Is an Independent Clinical Entity Associated  
724 with Early-Onset Encephalopathy." *European Journal of Human Genetics* 21 (3): 266–73.  
725 <https://doi.org/10.1038/ejhg.2012.156>.
- 726 Flint, Alexander C., Ulrike S. Maisch, Jochen H. Weishaupt, Arnold R. Kriegstein, and Hannah Monyer.  
727 1997. "NR2A Subunit Expression Shortens NMDA Receptor Synaptic Currents in Developing  
728 Neocortex." *Journal of Neuroscience* 17 (7): 2469–76. [https://doi.org/10.1523/jneurosci.17-07-](https://doi.org/10.1523/jneurosci.17-07-02469.1997)  
729 02469.1997.
- 730 Fuchs, Claudia, Norma Fustini, Stefania Trazzi, Laura Gennaccaro, Roberto Rimondini, and Elisabetta  
731 Ciani. 2018. "Treatment with the GSK3-Beta Inhibitor Tideglusib Improves Hippocampal  
732 Development and Memory Performance in Juvenile, but Not Adult, Cdkl5 Knockout Mice."  
733 *European Journal of Neuroscience* 47 (9): 1054–66. <https://doi.org/10.1111/ejn.13923>.
- 734 Fuchs, Claudia, Stefania Trazzi, Roberta Torricella, Rocchina Viggiano, Marianna De Franceschi, Elena  
735 Amendola, Cornelius Gross, Laura Calzà, Renata Bartesaghi, and Elisabetta Ciani. 2014. "Loss

- 736 of CDKL5 Impairs Survival and Dendritic Growth of Newborn Neurons by Altering AKT/GSK-3 $\beta$   
737 Signaling.” *Neurobiology of Disease* 70: 53–68. <https://doi.org/10.1016/j.nbd.2014.06.006>.
- 738 Guzman, Segundo, Alois Schlögl, and Christoph Schmidt-Hieber. 2014. “Stimfit: Quantifying  
739 Electrophysiological Data with Python .” *Frontiers in Neuroinformatics* .
- 740 Hall, Benjamin J., Beth Ripley, and Anirvan Ghosh. 2007. “NR2B Signaling Regulates the Development  
741 of Synaptic AMPA Receptor Current.” *Journal of Neuroscience* 27 (49): 13446–56.  
742 <https://doi.org/10.1523/JNEUROSCI.3793-07.2007>.
- 743 Harlow, Emily G., Sally M. Till, Theron A. Russell, Lasani S. Wijetunge, Peter Kind, and Anis Contractor.  
744 2010. “Critical Period Plasticity Is Disrupted in the Barrel Cortex of Fmr1 Knockout Mice.” *Neuron*  
745 65 (3): 385–98. <https://doi.org/10.1016/j.neuron.2010.01.024>.
- 746 Hector, Ralph D., Owen Dando, Nicoletta Landsberger, Charlotte Kilstrup-Nielsen, Peter C. Kind, Mark  
747 E.S. S Bailey, and Stuart R. Cobb Cobb. 2016. “Characterisation of CDKL5 Transcript Isoforms  
748 in Human and Mouse.” *PLoS ONE* 11 (6): 1–22. <https://doi.org/10.1371/journal.pone.0157758>.
- 749 Hector, Ralph D., Owen Dando, Tuula E. Ritakari, Peter C. Kind, Mark E.S. S Bailey, and Stuart R.  
750 Cobb. 2017. “Characterisation of Cdkl5 Transcript Isoforms in Rat.” *Gene* 603: 21–26.  
751 <https://doi.org/10.1016/j.gene.2016.12.001>.
- 752 Hector, Ralph D., Vera M. Kalscheuer, Friederike Hennig, Helen Leonard, Jenny Downs, Angus Clarke,  
753 Tim A. Benke, et al. 2017. “ CDKL5 Variants .” *Neurology Genetics* 3 (6): e200.  
754 <https://doi.org/10.1212/nxg.0000000000000200>.
- 755 Isaac, John T.R., Michael C. Crair, Roger A. Nicoll, and Robert C. Malenka. 1997. “Silent Synapses  
756 during Development of Thalamocortical Inputs.” *Neuron* 18 (2): 269–80.  
757 [https://doi.org/10.1016/S0896-6273\(00\)80267-6](https://doi.org/10.1016/S0896-6273(00)80267-6).
- 758 Kamboj, S. K., G. T. Swanson, and S. G. Cull-Candy. 1995. “Intracellular Spermine Confers  
759 Rectification on Rat Calcium-permeable AMPA and Kainate Receptors.” *The Journal of*  
760 *Physiology* 486 (2): 297–303. <https://doi.org/10.1113/jphysiol.1995.sp020812>.
- 761 Longair, Mark H, Dean A Baker, and J Douglas Armstrong. 2011. “Simple Neurite Tracer: Open Source  
762 Software for Reconstruction, Visualization and Analysis of Neuronal Processes.” *Bioinformatics*  
763 27 (17): 2453–54. <https://doi.org/10.1093/bioinformatics/btr390>.
- 764 Lüthi, Andreas, Lucia Schwyzer, José María Mateos, Beat H. Gähwiler, and R. Anne McKinney. 2001.  
765 “NMDA Receptor Activation Limits the Number of Synaptic Connections during Hippocampal

- 766           Development.” *Nature Neuroscience* 4 (11): 1102–7. <https://doi.org/10.1038/nn744>.
- 767   MacKay CI, Wong K, Demarest ST, Benke TA, Downs J, and Leonard H (2019) Exploring genotype-  
768           phenotype relationships in the CDKL5 deficiency disorder using an international dataset. *Clin*  
769           *Genet.* 99:157-165.
- 770   Mainen, Zachary F, and Terrence J Sejnowski. 1996. “Influence of Dendritic Structure on Firing Pattern  
771           in Model Neocortical Neurons.” *Nature* 382 (6589): 363–66. <https://doi.org/10.1038/382363a0>.
- 772   Manita, Satoshi, Takayuki Suzuki, Masashi Inoue, Yoshihisa Kudo, and Hiroyoshi Miyakawa. 2007.  
773           “Paired-Pulse Ratio of Synaptically Induced Transporter Currents at Hippocampal CA1 Synapses  
774           Is Not Related to Release Probability.” *Brain Research* 1154 (June): 71–79.  
775           <https://doi.org/10.1016/J.BRAINRES.2007.03.089>.
- 776   Mulcahey, Patrick J., Sheng Tang, Hajime Takano, Alicia White, Dayana R. Davila Portillo, Owen M.  
777           Kane, Eric D. Marsh, Zhaolan Zhou, and Douglas A. Coulter. 2020. “Aged Heterozygous Cdkl5  
778           Mutant Mice Exhibit Spontaneous Epileptic Spasms.” *Experimental Neurology* 332 (June):  
779           113388. <https://doi.org/10.1016/j.expneurol.2020.113388>.
- 780   Muñoz, Ivan M, Michael E Morgan, Julien Peltier, Florian Weiland, Mateusz Gregorczyk, Fiona CM M  
781           Brown, Thomas Macartney, Rachel Toth, Matthias Trost, and John Rouse. 2018. “  
782           Phosphoproteomic Screening Identifies Physiological Substrates of the CDKL 5 Kinase .” *The*  
783           *EMBO Journal* 37 (24): 1–19. <https://doi.org/10.15252/emboj.201899559>.
- 784   Nawaz, Mohammad Sarfaraz, Elisa Giarda, Francesco Bedogni, Paolo La Montanara, Sara Ricciardi,  
785           Dalila Ciceri, Tiziana Alberio, Nicoletta Landsberger, Laura Rusconi, and Charlotte Kilstrup-  
786           Nielsen. 2016. “CDKL5 and Shootin1 Interact and Concur in Regulating Neuronal Polarization.”  
787           *PLoS ONE* 11 (2). <https://doi.org/10.1371/journal.pone.0148634>.
- 788   Okuda, Kosuke, Shizuka Kobayashi, Masahiro Fukaya, Aya Watanabe, Takuto Murakami, Mai  
789           Hagiwara, Tempei Sato, et al. 2017. “CDKL5 Controls Postsynaptic Localization of GluN2B-  
790           Containing NMDA Receptors in the Hippocampus and Regulates Seizure Susceptibility.”  
791           *Neurobiology of Disease* 106: 158–70. <https://doi.org/10.1016/j.nbd.2017.07.002>.
- 792   Okuda, Kosuke, Keizo Takao, Aya Watanabe, Tsuyoshi Miyakawa, Masashi Mizuguchi, and Teruyuki  
793           Tanaka. 2018. “Comprehensive Behavioral Analysis of the Cdkl5 Knockout Mice Revealed  
794           Significant Enhancement in Anxiety- and Fear-Related Behaviors and Impairment in Both



- 795 Acquisition and Long-Term Retention of Spatial Reference Memory.” *Plos One* 13 (4).  
796 <https://doi.org/10.1371/journal.pone.0196587.t001>.
- 797 Oliveira, Laura S., Anna Sumera, and Sam A. Booker. 2021. “Repeated Whole-Cell Patch-Clamp  
798 Recording from CA1 Pyramidal Cells in Rodent Hippocampal Slices Followed by Axon Initial  
799 Segment Labeling.” *STAR Protocols* 2 (1): 100336. <https://doi.org/10.1016/j.xpro.2021.100336>.
- 800 Olson, Heather E., Scott T. Demarest, Elia M. Pestana-Knight, Lindsay C. Swanson, Sumaiya Iqbal,  
801 Dennis Lal, H. Leonard, J. Helen Cross, O. Devinsky, and T. A. Benke. 2019. “Cyclin-Dependent  
802 Kinase-Like 5 Deficiency Disorder: Clinical Review.” *Pediatric Neurology* 97: 18–25.  
803 <https://doi.org/10.1016/j.pediatrneurol.2019.02.015>.
- 804 Pickard, Lisa, Jacques Noël, Jeremy M Henley, Graham L Collingridge, and Elek Molnar. 2000.  
805 “Developmental Changes in Synaptic AMPA and NMDA Receptor Distribution and AMPA  
806 Receptor Subunit Composition in Living Hippocampal Neurons.” *The Journal of Neuroscience* 20  
807 (21): 7922 LP – 7931. <https://doi.org/10.1523/JNEUROSCI.20-21-07922.2000>.
- 808 Racca, Claudia, F. Anne Stephenson, Peter Streit, J. David B. Roberts, and Peter Somogyi. 2000.  
809 “NMDA Receptor Content of Synapses in Stratum Radiatum of the Hippocampal CA1 Area.”  
810 *Journal of Neuroscience* 20 (7): 2512–22. <https://doi.org/10.1523/jneurosci.20-07-02512.2000>.
- 811 Ricciardi, Sara, Federica Ungaro, Melanie Hambrock, Nils Rademacher, Gilda Stefanelli, Dario  
812 Brambilla, Alessandro Sessa, et al. 2012. “CDKL5 Ensures Excitatory Synapse Stability by  
813 Reinforcing NGL-1-PSD95 Interaction in the Postsynaptic Compartment and Is Impaired in  
814 Patient iPSC-Derived Neurons.” *Nature Cell Biology* 14 (9): 911–23.  
815 <https://doi.org/10.1038/ncb2566>.
- 816 Sala, Grazia Della, Elena Putignano, Gabriele Chelini, Riccardo Melani, Eleonora Calcagno, Gian  
817 Michele Ratto, Elena Amendola, Cornelius T. Gross, Maurizio Giustetto, and Tommaso  
818 Pizzorusso. 2016. “Dendritic Spine Instability in a Mouse Model of CDKL5 Disorder Is Rescued  
819 by Insulin-like Growth Factor 1.” *Biological Psychiatry* 80 (4): 302–11.  
820 <https://doi.org/10.1016/j.biopsych.2015.08.028>.
- 821 Siri B et al., (2021) CDKL5 deficiency disorder in males: Five new variants and review of the literature.  
822 *Eur J of Paediatr Neurol.* 33:9-20.
- 823 Spruston, N, and D Johnston. 1992. “Perforated Patch-Clamp Analysis of the Passive Membrane

- 824 Properties of Three Classes of Hippocampal Neurons.” *Journal of Neurophysiology* 67 (3): 508–  
825 29. <https://doi.org/10.1152/jn.1992.67.3.508>.
- 826 Staff, Nathan P, Hae-Yoon Jung, Tara Thiagarajan, Michael Yao, and Nelson Spruston. 2000. “Resting  
827 and Active Properties of Pyramidal Neurons in Subiculum and CA1 of Rat Hippocampus.” *Journal*  
828 *of Neurophysiology* 84 (5): 2398–2408. <https://doi.org/10.1152/jn.2000.84.5.2398>.
- 829 Tang, Sheng, Barbara Terzic, I-Ting Judy Ting Judy Wang, Nicolas Sarmiento, Katherine Sizov, Yue  
830 Cui, Hajime Takano, Eric D. Marsh, Zhaolan Zhou, and Douglas A. Coulter. 2019. “Altered  
831 NMDAR Signaling Underlies Autistic-like Features in Mouse Models of CDKL5 Deficiency  
832 Disorder.” *Nature Communications* 10 (1): 1–14. <https://doi.org/10.1038/s41467-019-10689-w>.
- 833 Tang, Sheng, I. Ting Judy Wang, Cuiyong Yue, Hajime Takano, Barbara Terzic, Katarina Pance, Jun  
834 Y. Lee, Yue Cui, Douglas A. Coulter, and Zhaolan Zhou. 2017. “Loss of CDKL5 in Glutamatergic  
835 Neurons Disrupts Hippocampal Microcircuitry and Leads to Memory Impairment in Mice.” *Journal*  
836 *of Neuroscience* 37 (31): 7420–37. <https://doi.org/10.1523/JNEUROSCI.0539-17.2017>.
- 837 Vetter, Philipp, Arnd Roth, and Michael Häusser. 2001. “Propagation of Action Potentials in Dendrites  
838 Depends on Dendritic Morphology.” *Journal of Neurophysiology* 85 (2): 926–37.  
839 <https://doi.org/10.1152/jn.2001.85.2.926>.
- 840 Wang, I. Ting Judy, Megan Allen, Darren Goffin, Xinjian Zhu, Andrew H. Fairless, Edward S. Brodtkin,  
841 Steve J. Siegel, Eric D. Marsh, Julie A. Blendy, and Zhaolan Zhou. 2012. “Loss of CDKL5  
842 Disrupts Kinome Profile and Event-Related Potentials Leading to Autistic-like Phenotypes in  
843 Mice.” *Proceedings of the National Academy of Sciences of the United States of America* 109  
844 (52): 21516–21. <https://doi.org/10.1073/pnas.1216988110>.
- 845 Yennawar, Madhumita, Rachel S. White, and Frances E. Jensen. 2019. “AMPA Receptor Dysregulation  
846 and Therapeutic Interventions in a Mouse Model of CDKL5 Deficiency Disorder.” *Journal of*  
847 *Neuroscience* 39 (24): 4814–28. <https://doi.org/10.1523/JNEUROSCI.2041-18.2019>.
- 848 Zhu, Yong Chuan, and Zhi Qi Xiong. 2019. “Molecular and Synaptic Bases of CDKL5 Disorder.”  
849 *Developmental Neurobiology* 79 (1): 8–19. <https://doi.org/10.1002/dneu.22639>.
- 850
